# Supplementary material
Source: Research Square preprint supplement (doi:10.21203/rs.3.rs-8583137/v1)
Supplement: Supplementary file 1 [file 7986c583e5b17d7cd84cf429.docx]

**Legends to supplementary figures**

**Supplementary Figure S1 :** Intermediate validation steps in the generation of the integrated spatial dataset.

**a,** Boxplots summarizing the number of spots per meta-spot for each individual sample. **b,** Histogram summarizing the distribution of the number of spots per meta-spot across the dataset. The blue dashed line corresponds to the median value. **c,** Number of meta-clusters of the merged Visium dataset according to Seurat resolution. The grey dashed line corresponds to the selected resolution (first curve plateau). **d,** Clustree illustrating the transition of clusters according to clustering resolution. Each color corresponds to a distinct resolution from 0.2 to 1.2. **e,** Sankey plot showing the correspondence between meta-spots ordered by sample and the various meta-clusters.

**Supplementary Figure S2 :** Validation of the spatial organization of meta-clusters.

**a,** Projection of Seurat meta-clusters across the Visium capture areas across the 48 samples. Color code is the following: red: tumor-cycling, medium blue: tumor-intermediate, pink: tumor-infiltrated, grey: tumor-myofibroblasts, green: stroma A, orange: stroma B, black: necrosis, purple: muscularis propria, bright blue: lymphoid aggregates, yellow: connective tissue, including nerves or arteries, brown: normal colon epithelium. **b,** Boxplots summarizing the spatial correlation indexes (Moran’s I) across the 48 samples for each meta-cluster, ordered as in Fig 2c. The meta-cluster number is indicated below each boxplot. The dashed line corresponds to the median Moran’s I value.

**Supplementary Figure S3 :** Representative H&E areas of corresponding to the various tumor, stromal and other ecotypes in sample #74_D1.

**Supplementary Figure S4 :** Molecular hallmarks of the various ecotypes

**a,** Violin plots summarizing the levels of scores corresponding to CMS2, CMS3 and epithelial signatures across the 10 ecotypes and those of scores corresponding to Cell Cycle and WNT, or that of CNV fraction across the 4 tumor ecotypes. **b,** Violin plots summarizing the levels of scores corresponding to the CMS1, CMS4 and mesenchymal signatures across the 10 ecotypes. **c,** Violin plots summarizing the levels of scores corresponding to Neutrophils across the 10 ecotypes. **d,** Violin plots summarizing the levels of scores corresponding to T cells and B cells across the 10 ecotypes. Color code is the following: red: tumor-cycling, medium blue: tumor-intermediate, pink: tumor-infiltrated, grey: tumor-myofibroblasts, green: stroma A, orange: stroma B, black: necrosis, purple: muscularis propria, bright blue: lymphoid aggregates, yellow: connective tissue, nerves or arteries, brown: normal colon epithelium. Scores were generated according to 1 for CMS, 2 for epithelial, mesenchymal, cell cycle and WNT signatures or using MCPcounter for neutrophils, B and T cells. The CNV fraction was calculated using FastCNV (See materials and methods).

**Supplementary Figure S5 :** Histogram summarizing the number of samples out of 48 containing spots along each meta-cluster (top) and distribution of spot proportions in samples containing the corresponding ecotype (bottom).

**Supplementary Figure S6 :** Proportions of the various ecotypes in the 48 samples

Barplots summarizing the proportions of the various ecotypes in the 48 samples ordered according to the cumulative proportion of tumor ecotypes **(a)** or the cumulative proportion of stromal ecotypes **(b)**. Samples corresponding to patients in the relapse group are highlighted with a black asterisk and corresponding to dMMR patients are highlighted with a red asterisk. Color code is the following: red: tumor-cycling, medium blue: tumor-intermediate, pink: tumor-infiltrated, grey: tumor-myofibroblasts, green: stroma A, orange: stroma B, black: necrosis, purple: muscularis propria, bright blue: lymphoid aggregates, yellow: connective tissue, nerves or arteries, brown: normal colon epithelium.

**Supplementary Figure S7 :** Comparison of proportions of spots in tumor or stromal ecotypes according to disease recurrence

**a-b,** Barplots summarizing the relative proportions of spots belonging to the 4 tumor (red: tumor-cycling, blue, tumor-intermediate, pink: tumor-infiltrated, grey: tumor-myofibroblast) and the 2 stromal (green: stroma A, orange: stroma B) ecotypes in patients without or with relapse in the whole dataset (n=48) **(a)** or among pMMR patients (n=36) **(b)**. **c-d,** Boxplots comparing the cumulative proportions of tumor or stromal ecotypes in patients without or with relapse in the whole dataset (n=48) **(c)** or among pMMR patients (n=36) **(d)**.

**Supplementary Figure S8 :** Boxplots showing the scaled expression of the DEG identified in Figure 3 as enriched in the stroma of patients with relapse **(a)** or the enrichment score of REC and iREC signatures 3, YAP-associated signatures 4,5 or the RSC signature from 6 **(b)** in tumor and stromal ecotypes according to disease recurrence.

**Supplementary Figure S9 :** Correlation between *ANXA1* and collagen-expressing genes in stromal ecotypes according to relapse.

Scatter plots showing the correlations between expression of *ANXA1* and that of COL6A2 or COL6A3 in stroma A meta-spots or that of COL6A1 or COL6A2 in stroma B meta-spots. Dots corresponding to meta-spots and correlation summary data are colored according to patient relapse status: pink for patients with relapse, blue for patients without relapse.

**Supplementary Figure S10 :** Projection of stromal subclusters across the Visium capture areas across the 48 samples.

Color code is the following: light blue: stroma-A1, light green: stroma-A2, light orange: stroma-B1, light pink: stroma-B2, light yellow: stroma-B3.

**Supplementary Figure S11 :** Prevalence of stromal subclusters across the 48-sample dataset.

Histogram summarizing the number of samples out of 48 containing spots along each stromal subcluster (top) and distribution of stromal spot proportions in samples containing the corresponding stromal subcluster (bottom). Color code is the following: light blue: stroma-A1, light green: stroma-A2, light orange: stroma-B1, light pink: stroma-B2, light yellow: stroma-B3.

**Supplementary Figure S12 :** Expression of the DEG enriched in stromal ecotypes of patients with relapse according to stromal sub-cluster and disease recurrence.

(**a-d**) Boxplots showing the scaled expression of the DEGs in meta-spots corresponding to stroma A1 (**a**), stroma A2 (**b**), stroma B1 meta-spots (**c**), or stroma B2 meta-spots (**d**) according to disease recurrence. **e,** Individual boxplots for each DEG showing its scaled expression according to stromal sub-cluster and disease recurrence. For statistical analysis, refer to panel **e**.

**Supplementary Figure S13 :** Distribution of stromal sub-clusters at high resolution

Spatial plots showing the expression of the tumor cell markers EPCAM and CEACAM6 as well as the distribution of the five stromal sub-clusters across four samples from the Visium standard dataset re-profiled with Visium HD and one sample from the Visium HD public repository 7.

**References**

1. Eide, P. W., Bruun, J., Lothe, R. A. & Sveen, A. CMScaller: an R package for consensus molecular subtyping of colorectal cancer pre-clinical models. *Sci. Rep.* **7**, 16618 (2017).

2. Guinney, J. *et al.* The consensus molecular subtypes of colorectal cancer. *Nat. Med.* **21**, 1350–1356 (2015).

3. Ogden, S. *et al.* Phenotypic heterogeneity and plasticity in colorectal cancer metastasis. *Cell Genomics* **5**, 100881 (2025).

4. Gregorieff, A., Liu, Y., Inanlou, M. R., Khomchuk, Y. & Wrana, J. L. Yap-dependent reprogramming of Lgr5(+) stem cells drives intestinal regeneration and cancer. *Nature* **526**, 715–718 (2015).

5. Serra, D. *et al.* Self-organization and symmetry breaking in intestinal organoid development. *Nature* **569**, 66–72 (2019).

6. Ayyaz, A. *et al.* Single-cell transcriptomes of the regenerating intestine reveal a revival stem cell. *Nature* **569**, 121–125 (2019).

7. Oliveira, M. F. de *et al.* High-definition spatial transcriptomic profiling of immune cell populations in colorectal cancer. *Nat. Genet.* **57**, 1512–1523 (2025).
