# Supplementary material
Source: Research Square preprint supplement (doi:10.21203/rs.3.rs-8583137/v1)
Supplement: Supplementary file 2 [file 963cdb7ce6f3aee91bbe4b88.xlsx]

## Sheet: CMScaller
CMS1	CMS2	CMS3	CMS4
TNNT1	LY6G6D	PTGER2	SYDE1
DUSP4	QPRT	IL1R2	MRAS
SECTM1	FARP1	ZBTB7C	FERMT2
MAPK12	VAV3	BCAS1	GLI3
ADGRG6	RUBCNL	AQP3	MYL9
TRIB2	ENGASE	FAM174B	EVC
RAB27B	HUNK	SLC9A2	MAP1A
FSCN1	TSPAN6	KIAA1324	FGFR1
WARS	IHH	RAP1GAP	SERPINF1
ETV5	CYP2B6	MLPH	SPOCK1
TYMS	SGK2	RAB27B	ATP8B2
PRF1	RNF43	AGR2	VIM
ENO2	ASCL2	CADPS	DZIP1
TFAP2A	ACSL6	HSPA2	TIMP2
MOCOS	EREG	KLF4	FBLN1
APOL2	GNG4	KLK11	TNS1
PLLP	MPP1	LGALS4	ANGPTL2
GAS2L1	CEBPA	CREB3L1	ARHGEF17
MT2A	NR1I2	SERPINA1	ANTXR1
IRF1	PPP1R14D	CTSE	SYT11
ICAM1	CEL	SLC39A8	NRP2
GRAMD1B	ARID3A	EPHA4	MFGE8
PIWIL1	A1CF	ST3GAL4	LBH
UBE2L6	KHDRBS3	ARSJ	FBN1
RAMP1	DRD2	PCCA	MPDZ
HSPA4L	SATB2	PRUNE2	COL6A2
SKA1	CDHR1	TFF1	AXL
RHOF	DDC	CCL24	PTPRM
PLK2	KRT23	FGFR2	AKT3
IFIT2	GGH	DSC3	ZEB1
RAC3	DPEP1	MUC2	TGFB1I1
DBN1	TFCP2L1	FAM13A	HSPB8
ARNTL2	C2orf54	SMAD9	FILIP1L
IFIT3	SESN1	GNE	TCF4
CLSPN	AREG	TFF3	C14orf132
BLVRA	TLE2	ERN2	NOTCH3
IFI30	CAB39L	ATP8A1	IL1R1
STAT1	PTPRD	TNFRSF11B	TIMP3
XAF1	CDX2	ANXA13	PKD2
SLC7A11	AOAH	GUCY2C	TUBB6
RARRES1	MEP1A	ALDH1L1	CDH11
TAP1	PLCB4	ALDH3A1	LAMA4
FDXR	CFTR	PDE9A	MRC2
PRSS12	SRPX2	CYP3A5	PTRF
CTSE	GABRE	UGT1A8	FHL1
ABCA3	PTPRO	C2orf72	PLEKHO1
BST2	CLDN15	SCNN1A	DPYSL3
PTPRU	ID1	PTPN13	ITGA5
PBK	CTSV	GPA33	COPZ2
MICB	CXCL14	NMU	MCC
OAS2	DMD	ATP2A3	PCDH7
LY6E	ABCC2	TFAP2A	APBB1
APOL1	DACH1	MAOA	LOX
BIRC3	CHP2	SPINK1	TMEM47
KIAA1549L	SELENBP1	DACH1	PDLIM7
PSMB9	FABP1	CPS1	INHBA
MT1X	SLC9A3	PADI2	SPON2
MYRF	CPNE7	FOXA1	COL18A1
PMAIP1	SPINK1	MATN2	C16orf45
MTCL1	NOX1	KRT20	CYBRD1
GAD1	PCLO	HMGCS2	CNTNAP1
TNFAIP2	CDHR2	PIGR	EML1
CXCR4	WNT11	CKB	TPM2
ZBED2	GAL	CA12	TENM3
SLC1A3	CPLX2	IGFBP2	CTGF
OASL	NRXN3	PPP1R9A	GLI2
CD55	FAM189A1	RAB3B	NR3C1
ISG15	SCN5A	LYZ	QKI
PLA2G4A	FBXO2	ADGRF1	FZD1
SNPH	CADPS	LCN2	DLC1
APLP1	FER1L4	LRP4	NRP1
KYNU	STRA6	CA9	MAP3K12
CRIP1	ABCB1	NOX1	COL6A1
KLK10	COL9A3	GAD1	OSMR
SLC43A3	UGT1A8	ALDH1A2	FLNA
TIAM1	HMGCS2	PCLO	MYO5A
BAG2	CACNG4	CDHR1	MAP1B
MX1	BMP7	SLC4A4	ZFHX4
FOSL1	CYP24A1	OLFM4	BASP1
WNT7B	FZD10	DKK1	BCAT1
NTSR1	FOXJ1	FABP1	GPR176
SERPINB5	OLFM4	SLCO1B3	RBMS1
AGR2		TM4SF4	VGLL3
AQP5		VGLL1	ANK2
DAPK1			GEM
DPP4			LTBP1
UST			COL4A2
FAM169A			AKAP12
GLS2			LOXL1
SLC1A1			MMP14
EPHB6			CYP1B1
APOE			RUSC2
IGF2BP3			CDH2
SPON1			CLIP4
LYZ			PDLIM4
SAMD9			BICC1
ADGRB2			THBS1
PNMA2			LOXL2
TENM3			SYNPO
ATP1A3			NUAK1
ANO1			RAI14
MCTP1			TSPAN4
GCNT3			CTSL
CXCL8			LTBP3
SLC4A3			LAMB2
AHNAK2			ARL4C
KCNK1			RASSF8
CALB2			SNAI2
TM4SF4			TRPV2
MLPH			TPST1
TNS4			JPH2
IFI6			SGCE
HSD17B2			TTC28
OLR1			CRIP2
MAOB			SV2A
PLAC8			EMP3
CALB1			PMP22
SLC4A4			ALDH1A3
FRAS1			APOE
TRIM29			CHST3
ANKRD1			KIRREL
KLK11			ATP2B4
ALPP			NID1
PI3			CLEC11A
CXCL5			FNBP1
KRT6A			OLFML3
ALPPL2			FAM129A
			CHST11
			RGL1
			UCHL1
			F2R
			WWTR1
			LAMA2
			PALLD
			UNC5B
			PCDHGC3
			GPX3
			SYNE1
			COL16A1
			FSTL3
			DTX3
			ITPR1
			MYH10
			SIRPA
			IGFBP6
			RDX
			ANXA6
			OLR1
			TUSC3
			SERPINE1
			ABCA1
			SCARA3
			SMARCA1
			SLC1A3
			ARMCX2
			TBC1D9
			SRPX
			PTPRS
			GPRC5B
			MDFIC
			ADAM19
			ADAMTSL4
			AOX1
			RUNX2
			RGS4
			FAM198B
			SYNC
			SMO
			SLC2A3
			CADM1
			HDGFRP3
			CRMP1
			HSPG2
			PMEPA1
			WWC2
			SORBS1
			PLAU
			GPC1
			LARP6
			PHLDA3
			NAV3
			OBSL1
			LEF1
			PAPPA
			SEMA7A
			FAM127A
			AMIGO2
			DMD
			FLNC
			WASF3
			FKBP10
			AHNAK2
			MPP1
			CALB2
			CRABP2
			CDIP1
			QPRT
			RBP1
			FST
			TGFB2
			L1CAM
			SRPX2
			PLTP
			STRA6
			FAM155A
			HDAC9
			S100A4
			ID4
			CST6
			PCDHGB6
			SCG2
			CST1
			NRXN3
			STMN3
			LY6G6D
			CACNG4
			IFIT1
			AP3B2
			FADS2
			GNG4
			MME
			C2orf54
			SCN5A
			PCDHGB5
			WNT11
			KRT17
			UPK2
			CYP2B6
			PTPRO
			EEF1A2
			DRD2
			CEL
			ACSL6
			CYP24A1
			DKK1
			EREG
			KRT23

## Sheet: Guinney
Epithelial_sig	WNT	MYC	Mesenchymal_sig	EMT	TGFB	SRC	JAK_STAT	Caspases	Proteasome	CellCycle	integrinB3	VEGF	Intestinal_stem_cells	Glycolysis	Fatty_acids
RSLD1	AXIN1	APEX	TGFBR1	CDH11	TGFB1	CCNB1	CCL2	APAF1	IFNG	AAAS	CCN1	AAMP	DCLK1	ABCB6	AADAT
KAZALD1	BTRC	CAD	ACVR1	CDH2	TGFB2	CDC25A	CCR2	ARHGDIB	POMP	ABL1	CD47	ABI1	PCDH8	ADORA2B	ACAA1
LYPD5	CCND1	CCNA2	RNF11	VIM	TGFB3	CDC25B	CLCF1	BIRC2	PSMA1	ABRAXAS1	COL1A1	ABI2	LGR5	AGL	ACAA2
CLDN9	CREBBP	CCND2	NFIC	MMP2	TGFBR1	CDC25C	F2	BIRC3	PSMA2	ACD	COL1A2	ACTB	CYP2E1	AGRN	ACADL
CD44	CSNK2A1	CCNE1	ETV5	ZEB1	TGFBR2	CDK1	F2R	CASP1	PSMA3	ACTR1A	COL4A1	ACTG1	LIMCH1	AK3	ACADM
LCN2	CTBP1	CDK4	SLC39A6	ZEB2	SMAD2	CSK	FGFR3	CASP10	PSMA4	AHCTF1	COL4A3	AHCYL1	ARL4C	AK4	ACADS
CRB3	CTNNB1	CDKN1A	SMAD3	SNAI1	SMAD3	GRB2	HCLS1	CASP2	PSMA5	AJUBA	COL4A4	AKT1	FAM49A	AKR1A1	ACADVL
MET	DKK1	CDKN2B	FOXC1	SNAI2	SMAD4	PRKCA	HGS	CASP3	PSMA6	AKAP9	COL4A5	AKT2	BEX4	ALDH7A1	ACAT2
RAS	DKK2	CHC1	FOXC2	TWIST1		PRKCB	IFNAR1	CASP4	PSMA6P4	AKT1	COL4A6	AKT3	ASCL2	ALDH9A1	ACO2
S100P	DVL1	DDX18	CDON	TWIST2		PTPRA	IFNAR2	CASP6	PSMA7	AKT2	EDIL3	AXL	FSTL1	ALDOA	ACOT2
TNS4	FRAT1	DUSP1	GLI3	FOXC1		VPS16	IFNL1	CASP7	PSMA8	AKT3	F11R	BAIAP2	SORCS2	ALDOB	ACOT8
CLDN7	FZD1	EIF4E	CDH2				IL12A	CASP8	PSMB1	ALMS1	FBN1	BCAR1	PSRC1	ALG1	ACOX1
KRT18	GSK3B	ENO1	FGF1				IL20	CASP9	PSMB10	ANAPC1	FGA	BRK1	TUBB2B	ANG	ACSL1
KRT8	HDAC1	FASN	TIAM1				IL22RA2	DFFA	PSMB11	ANAPC10	FGB	CALM1	RASSF5	ANGPTL4	ACSL4
RBM35A	HNF1A	FKBP4	SMAD1				IL31RA	DFFB	PSMB2	ANAPC11	FGG	CAV1	SCN2B	ANKZF1	ACSL5
SOX9	KREMEN2	FN1	FN1				LYN	GZMB	PSMB3	ANAPC15	FN1	CDC42	E330027M22RIK	ARPP19	ACSM3
MAL2	LRP6	GADD45A	FGF7				NF2	LMNA	PSMB4	ANAPC16	HMGB1	CDH5	SLC14A1	ARTN	ACSS1
CDH1	MAP3K7	HSPA4	GLIS2				NMI	LMNB1	PSMB5	ANAPC2	IBSP	CRK	PTPRO	AURKA	ADH1C
CLDN4	MYC	HSPCAL3	FBLN1				PIAS1	LMNB2	PSMB6	ANAPC4	ITGA2B	CTNNA1	NAV1	B3GALT6	ADH7
ELF3	NKD1	HSPD1	MEOX2				PIGU	PARP1	PSMB7	ANAPC5	ITGAV	CTNNB1	PVT1	B3GAT1	ADIPOR2
OCLN	NKD2	HSPE1	GLI2				SOCS1	PRF1	PSMB8	ANAPC7	ITGB3	CTNND1	KIF26B	B3GAT3	ADSL
CCL14	NLK	LDHA	LAMB2				SOCS2	SREBF1	PSMB9	ANKLE2	KDR	CYBA	SLC1A2	B3GNT3	ALAD
CEACAM1	PPARD	MGST1	MAP3K3				SOCS3	XIAP	PSMC1	ANKRD28	L1CAM	CYBB	C13ORF15	B4GALT1	ALDH1A1
EVI1	PPP2R5D	MYC	TCF4				SOCS6		PSMC1P4	ARPP19	LAMA4	CYFIP1	ASRGL1	B4GALT2	ALDH3A1
CD24	PROC	NCL	FGFR1				STAMBP		PSMC2	ATM	LAMB1	CYFIP2	CBS	B4GALT4	ALDH3A2
PRSS8	SMAD4	NME1	DZIP1				STAT1		PSMC3	ATR	LAMC1	DOCK1	VAV3	B4GALT7	ALDH9A1
TMPRSS4	TAB1	NME2	FLRT2				STAT2		PSMC4	ATRIP	PDGFB	ELMO1	CENPF	BIK	ALDOA
MMP15	TLE1	NPM1	RECK				STAT3		PSMC5	ATRX	PDGFRB	ELMO2	PTHLH	BPNT1	AOC3
RBM35B	WIF1	ODC1	SRPX				STAT4		PSMC6	AURKA	PECAM1	FLT1	IGFBP4	CACNA1H	APEX1
DSC2	WNT1	PPAT	ARMCX1				STAT5A		PSMD1	AURKB	PLAU	FLT4	CYP11A1	CAPN5	AQP7
ITGB4	APC	PTMA	VEGFB				STAT5B		PSMD11	B9D2	PLAUR	FYN	SLCO3A1	CASP6	AUH
MDST1R	PPP2CA	RPL23	WASF3						PSMD12	BABAM1	PVR	HRAS	PXDN	CD44	BCKDHB
JUP		RPL3	STX2						PSMD13	BABAM2	SDC1	HSP90AA1	EPHB3	CDK1	BLVRA
SPINT1		RPL6	SFRP1						PSMD14	BANF1	SDC4	HSPB1	FZD2	CENPA	BMPR1B
SDC1		RPS15A	FBLN5						PSMD2	BARD1	SPHK1	ITGAV	CHST11	CHPF	BPHL
PKP3		SRM	EPHA3						PSMD3	BIRC5	SPP1	ITGB3	MARVELD1	CHPF2	CA2
KRT19		TERT	SH2D3C						PSMD4	BLM	TGFBI	ITPR1	4933406C10RIK	CHST1	CA4
SFN		TFRC	MMRN2						PSMD6	BLZF1	TGFBR2	ITPR2	MEX3A	CHST12	CA6
FOXD2		THBS1	MRAS						PSMD7	BORA	THBS1	ITPR3	PHGDH	CHST2	CBR1
AREG		TNFSF6	WISP1						PSMD8	BRCA1	THY1	JUP	5730471H19RIK	CHST4	CBR3
GSK3B		TP53	SNAI2						PSME1	BRCA2	TNC	KDR	ESAM	CHST6	CD1D
ISK		TPM1	TWIST2						PSME2	BRCC3	VEGFA	KRAS	MPP3	CITED2	CD36
ETS2			TWIST1						PSME3	BRIP1	VTN	MAPK11	BEX1	CLDN3	CEL
TDGF1			AXL						PSME4	BTRC		MAPK12	ST3GAL3	CLDN9	CIDEA
CDX2			TAGLN						PSMF1	BUB1		MAPK13	TEAD2	CLN6	CPOX
CDX1			TFGB1I1						SEM1	BUB1B		MAPK14	BCL2	COG2	CPT1A
IHH			HTRA1							BUB3		MAPKAP1	PRICKLE1	COL5A1	CPT2
SHH			SPARC							CABLES1		MAPKAPK2	SOAT1	COPB2	CRAT
FOXA2			ASPN							CC2D1B		MAPKAPK3	LFNG	CTH	CRYZ
BCAR3			CTGF							CCNA1		MLST8	KLHL8	CXCR4	CYP1A1
KIAA0052			MGP							CCNA2		MTOR	HEBP2	CYB5A	CYP4A11
EPHB3			ECM2							CCNB1		NCF1	TGIF2	DCN	CYP4A22
			ZFPM2							CCNB2		NCF2	CD44	DDIT4	D2HGDH
			SIP1							CCND1		NCF4	TACC1	DEPDC1	DECR1
										CCND2		NCK1		DLD	DHCR24
										CCND3		NCK2		DPYSL4	DLD
										CCNE1		NCKAP1		DSC2	DLST
										CCNE2		NCKAP1L		ECD	ECH1
										CCNH		NOS3		EFNA3	ECHS1
										CCP110		NRAS		EGFR	ECI1
										CDC14A		NRP1		EGLN3	ECI2
										CDC16		NRP2		ELF3	EHHADH
										CDC20		PAK1		ENO1	ELOVL5
										CDC23		PAK2		ENO2	ENO2
										CDC25A		PAK3		ERO1A	ENO3
										CDC25B		PDPK1		EXT1	EPHX1
										CDC25C		PGF		EXT2	ERP29
										CDC26		PIK3CA		FAM162A	ETFDH
										CDC27		PIK3CB		FBP2	FABP1
										CDC45		PIK3R1		FKBP4	FABP2
										CDC6		PIK3R2		FUT8	FASN
										CDC7		PLCG1		G6PD	FH
										CDCA5		PRKACA		GAL3ST1	FMO1
										CDCA8		PRKACB		GALE	G0S2
										CDK1		PRKACG		GALK1	GABARAPL1
										CDK11A		PRKCA		GALK2	GAD2
										CDK11B		PRKCB		GAPDHS	GAPDHS
										CDK2		PRKCD		GCLC	GCDH
										CDK4		PRKCZ		GFPT1	GLUL
										CDK5RAP2		PRR5		GFUS	GPD1
										CDK6		PTK2		GLCE	GPD2
										CDK7		PTK2B		GLRX	GRHPR
										CDKN1A		PXN		GMPPA	GSTZ1
										CDKN1B		RAC1		GMPPB	H2AZ1
										CDKN1C		RASA1		GNE	HADH
										CDKN2A		RHOA		GNPDA1	HADHB
										CDKN2B		RICTOR		GOT1	HAO2
										CDKN2C		ROCK1		GOT2	HCCS
										CDKN2D		ROCK2		GPC1	HIBCH
										CDT1		SH2D2A		GPC3	HMGCL
										CENPA		SHB		GPC4	HMGCS1
										CENPC		SHC2		GPR87	HMGCS2
										CENPE		SPHK1		GUSB	HPGD
										CENPF		SRC		GYS1	HSD17B10
										CENPH		THEM4		GYS2	HSD17B11
										CENPI		TRIB3		HAX1	HSD17B4
										CENPJ		VAV1		HDLBP	HSD17B7
										CENPK		VAV2		HK2	HSDL2
										CENPL		VAV3		HMMR	HSP90AA1
										CENPM		VEGFA		HOMER1	HSPH1
										CENPN		VEGFB		HS2ST1	IDH1
										CENPO		VEGFC		HS6ST2	IDH3B
										CENPP		VEGFD		HSPA5	IDH3G
										CENPQ		WASF1		IDH1	IDI1
										CENPS		WASF2		IDUA	IL4I1
										CENPT		WASF3		IER3	INMT
										CENPU				IGFBP3	KMT5A
										CENPW				IL13RA1	LDHA
										CENPX				IRS2	LGALS1
										CEP131				ISG20	LTC4S
										CEP135				KDELR3	MAOA
										CEP152				KIF20A	MCEE
										CEP164				KIF2A	MDH1
										CEP192				LCT	MDH2
										CEP250				LDHA	ME1
										CEP290				LDHC	METAP1
										CEP41				LHPP	MGLL
										CEP43				LHX9	MIF
										CEP57				MDH1	MIX23
										CEP63				MDH2	MLYCD
										CEP70				ME1	NBN
										CEP72				ME2	NCAPH2
										CEP76				MED24	NSDHL
										CEP78				MERTK	NTHL1
										CETN2				MET	ODC1
										CHEK1				MIF	OSTC
										CHEK2				MIOX	PCBD1
										CHMP2A				MPI	PDHA1
										CHMP2B				MXI1	PDHB
										CHMP3				NANP	PPARA
										CHMP4A				NASP	PRDX6
										CHMP4B				NDST3	PSME1
										CHMP4C				NDUFV3	PTPRG
										CHMP6				NOL3	PTS
										CHMP7				NSDHL	RAP1GDS1
										CHTF18				NT5E	RDH11
										CHTF8				P4HA1	RDH16
										CKAP5				P4HA2	REEP6
										CKS1B				PAM	RETSAT
										CLASP1				PAXIP1	S100A10
										CLASP2				PC	SDHA
										CLIP1				PDK3	SDHC
										CLSPN				PFKFB1	SDHD
										CNEP1R1				PFKP	SERINC1
										CNTRL				PGAM1	SLC22A5
										COP1				PGAM2	SMS
										CSNK1D				PGK1	SUCLA2
										CSNK1E				PGLS	SUCLG1
										CSNK2A1				PGM2	SUCLG2
										CSNK2A2				PHKA2	TDO2
										CSNK2B				PKM	TP53INP2
										CTC1				PKP2	UBE2L6
										CTDNEP1				PLOD1	UGDH
										CUL1				PLOD2	UROD
										DAXX				PMM2	UROS
										DBF4				POLR3K	VNN1
										DCTN1				PPFIA4	XIST
										DCTN2				PPIA	YWHAH
										DCTN3				PPP2CB
										DHFR				PRPS1
										DIDO1				PSMC4
										DKC1				PYGB
										DMC1				PYGL
										DNA2				QSOX1
										DSCC1				RARS1
										DSN1				RBCK1
										DYNC1H1				RPE
										DYNC1I1				RRAGD
										DYNC1I2				SAP30
										DYNC1LI1				SDC1
										DYNC1LI2				SDC2
										DYNLL1				SDC3
										DYNLL2				SDHC
										DYRK1A				SLC16A3
										E2F1				SLC25A10
										E2F2				SLC25A13
										E2F3				SLC35A3
										E2F4				SLC37A4
										E2F5				SOD1
										E2F6				SOX9
										EMD				SPAG4
										EML4				SRD5A3
										ENSA				STC1
										EP300				STC2
										ERCC6L				STMN1
										ESCO1				TALDO1
										ESCO2				TFF3
										ESPL1				TGFA
										EXO1				TGFBI
										FBXL18				TKTL1
										FBXL7				TPBG
										FBXO5				TPI1
										FBXW11				TPST1
										FEN1				TXN
										FKBP6				UGP2
										FKBPL				VCAN
										FOXM1				VEGFA
										FZR1				VLDLR
										GAR1				XYLT2
										GINS1				ZNF292
										GINS2
										GINS3
										GINS4
										GMNN
										GOLGA2
										GORASP1
										GORASP2
										GSK3B
										GTSE1
										H2AB1
										H2AC14
										H2AC18
										H2AC19
										H2AC20
										H2AC4
										H2AC6
										H2AC7
										H2AC8
										H2AJ
										H2AX
										H2AZ1
										H2AZ2
										H2BC1
										H2BC10
										H2BC11
										H2BC12
										H2BC13
										H2BC14
										H2BC15
										H2BC17
										H2BC21
										H2BC3
										H2BC4
										H2BC5
										H2BC6
										H2BC7
										H2BC8
										H2BC9
										H2BS1
										H2BU1
										H3-3A
										H3-3B
										H3-4
										H3C1
										H3C10
										H3C11
										H3C12
										H3C13
										H3C14
										H3C15
										H3C2
										H3C3
										H3C4
										H3C6
										H3C7
										H3C8
										H4-16
										H4C1
										H4C11
										H4C12
										H4C13
										H4C14
										H4C15
										H4C2
										H4C3
										H4C4
										H4C5
										H4C6
										H4C8
										H4C9
										HAUS1
										HAUS2
										HAUS3
										HAUS4
										HAUS5
										HAUS6
										HAUS7
										HAUS8
										HDAC1
										HDAC8
										HERC2
										HJURP
										HMMR
										HSP90AA1
										HSP90AB1
										HSPA2
										HUS1
										INCENP
										IST1
										ITGB3BP
										JAK2
										KAT5
										KIF18A
										KIF20A
										KIF23
										KIF2A
										KIF2B
										KIF2C
										KMT5A
										KNL1
										KNTC1
										KPNB1
										LBR
										LCMT1
										LEMD2
										LEMD3
										LIG1
										LIN37
										LIN52
										LIN54
										LIN9
										LMNA
										LMNB1
										LPIN1
										LPIN2
										LPIN3
										LYN
										MAD1L1
										MAD2L1
										MAPK1
										MAPK3
										MAPRE1
										MASTL
										MAU2
										MAX
										MCM10
										MCM2
										MCM3
										MCM4
										MCM5
										MCM6
										MCM7
										MCM8
										MCPH1
										MDC1
										MDM2
										MDM4
										MIS12
										MIS18A
										MIS18BP1
										MLH1
										MLH3
										MNAT1
										MND1
										MRE11
										MSH4
										MSH5
										MYBL2
										MYC
										MZT1
										MZT2A
										MZT2B
										NBN
										NCAPD2
										NCAPD3
										NCAPG
										NCAPG2
										NCAPH
										NCAPH2
										NDC1
										NDC80
										NDE1
										NDEL1
										NEDD1
										NEK2
										NEK6
										NEK7
										NEK9
										NHP2
										NINL
										NIPBL
										NME7
										NOP10
										NPM1
										NSD2
										NSL1
										NUDC
										NUF2
										NUMA1
										NUP107
										NUP133
										NUP153
										NUP155
										NUP160
										NUP188
										NUP205
										NUP210
										NUP214
										NUP35
										NUP37
										NUP42
										NUP43
										NUP50
										NUP54
										NUP58
										NUP62
										NUP85
										NUP88
										NUP93
										NUP98
										ODF2
										OFD1
										OIP5
										OPTN
										ORC1
										ORC2
										ORC3
										ORC4
										ORC5
										ORC6
										PAFAH1B1
										PCBP4
										PCM1
										PCNA
										PCNT
										PDS5A
										PDS5B
										PHF20
										PHF8
										PHLDA1
										PIAS4
										PIF1
										PKMYT1
										PLK1
										PLK4
										PMF1
										POLA1
										POLA2
										POLD1
										POLD2
										POLD3
										POLD4
										POLE
										POLE2
										POLE3
										POLE4
										POLR2A
										POLR2B
										POLR2C
										POLR2D
										POLR2E
										POLR2F
										POLR2G
										POLR2H
										POLR2I
										POLR2J
										POLR2K
										POLR2L
										POM121
										POM121C
										POT1
										PPME1
										PPP1CB
										PPP1CC
										PPP1R12A
										PPP1R12B
										PPP2CA
										PPP2CB
										PPP2R1A
										PPP2R1B
										PPP2R2A
										PPP2R2D
										PPP2R3B
										PPP2R5A
										PPP2R5B
										PPP2R5C
										PPP2R5D
										PPP2R5E
										PPP6C
										PPP6R3
										PRDM9
										PRIM1
										PRIM2
										PRKACA
										PRKAR2B
										PRKCA
										PRKCB
										PSMA1
										PSMA2
										PSMA3
										PSMA4
										PSMA5
										PSMA6
										PSMA7
										PSMA8
										PSMB1
										PSMB10
										PSMB11
										PSMB2
										PSMB3
										PSMB4
										PSMB5
										PSMB6
										PSMB7
										PSMB8
										PSMB9
										PSMC1
										PSMC2
										PSMC3
										PSMC3IP
										PSMC4
										PSMC5
										PSMC6
										PSMD1
										PSMD10
										PSMD11
										PSMD12
										PSMD13
										PSMD14
										PSMD2
										PSMD3
										PSMD4
										PSMD5
										PSMD6
										PSMD7
										PSMD8
										PSMD9
										PSME1
										PSME2
										PSME3
										PSME4
										PSMF1
										PTK6
										PTTG1
										RAB1A
										RAB1B
										RAB2A
										RAB8A
										RAD1
										RAD17
										RAD21
										RAD50
										RAD51
										RAD51C
										RAD9A
										RAD9B
										RAE1
										RAN
										RANBP2
										RANGAP1
										RB1
										RBBP4
										RBBP7
										RBBP8
										RBL1
										RBL2
										RBX1
										RCC1
										RCC2
										REC8
										RFC1
										RFC2
										RFC3
										RFC4
										RFC5
										RHNO1
										RMI1
										RMI2
										RNF168
										RNF8
										RPA1
										RPA2
										RPA3
										RPA4
										RPS27
										RPS27A
										RRM2
										RSF1
										RTEL1
										RUVBL1
										RUVBL2
										SDCCAG8
										SEC13
										SEH1L
										SEM1
										SET
										SFI1
										SFN
										SGO1
										SGO2
										SHQ1
										SIRT2
										SKA1
										SKA2
										SKP1
										SKP2
										SMARCA5
										SMC1A
										SMC1B
										SMC2
										SMC3
										SMC4
										SPAST
										SPC24
										SPC25
										SPDL1
										SPO11
										SRC
										SSNA1
										STAG1
										STAG2
										STAG3
										STN1
										SUMO1
										SUN1
										SUN2
										SYCE1
										SYCE2
										SYCE3
										SYCP1
										SYCP2
										SYCP3
										SYNE1
										SYNE2
										TAOK1
										TEN1
										TERF1
										TERF2
										TERF2IP
										TERT
										TEX12
										TEX15
										TFDP1
										TFDP2
										TINF2
										TK1
										TMPO
										TNPO1
										TOP2A
										TOP3A
										TOPBP1
										TP53
										TP53BP1
										TPR
										TPX2
										TUBA1A
										TUBA1B
										TUBA1C
										TUBA3C
										TUBA3D
										TUBA3E
										TUBA4A
										TUBA4B
										TUBA8
										TUBAL3
										TUBB
										TUBB1
										TUBB2A
										TUBB2B
										TUBB3
										TUBB4A
										TUBB4B
										TUBB6
										TUBB8
										TUBB8B
										TUBG1
										TUBG2
										TUBGCP2
										TUBGCP3
										TUBGCP4
										TUBGCP5
										TUBGCP6
										TYMS
										UBA52
										UBB
										UBC
										UBE2C
										UBE2D1
										UBE2E1
										UBE2I
										UBE2N
										UBE2S
										UBE2V2
										UIMC1
										USO1
										VPS4A
										VRK1
										VRK2
										WAPL
										WEE1
										WRAP53
										WRN
										XPO1
										YWHAB
										YWHAE
										YWHAG
										YWHAH
										YWHAQ
										YWHAZ
										ZNF385A
										ZW10
										ZWILCH
										ZWINT

## Sheet: MCPcounter
T_cells	NK_cells	Cytotoxic_lymphocytes	CD8_T_cells	B_lineage	Myeloid_dendritic_cells	Monocytic_lineage	Neutrophils	Endothelial_cells	Fibroblasts
CD28	CD160	CD8A	CD8B	BANK1	CD1A	ADAP2	CA4	ACVRL1	COL1A1
CD3D	KIR2DL1	EOMES		CD19	CD1B	CSF1R	CEACAM3	APLN	COL3A1
CD3G	KIR2DL3	FGFBP2		CD22	CD1E	FPR3	CXCR1	BCL6B	COL6A1
CD5	KIR2DL4	GNLY		CD79A	CLEC10A	KYNU	CXCR2	BMP6	COL6A2
CD6	KIR3DL1	KLRC3		CR2	CLIC2	PLA2G7	CYP4F3	BMX	DCN
CHRM3-AS2	KIR3DS1	KLRC4		FCRL2	WFDC21P	RASSF4	FCGR3B	CDH5	GREM1
CTLA4	NCR1	KLRD1		IGKC		TFEC	HAL	CLEC14A	PAMR1
FLT3LG	PTGDR			MS4A1			KCNJ15	DIPK2B	TAGLN
ICOS	SH2D1B			PAX5			MEGF9	EDN1
MAL							SLC25A37	ADGRL4
MGC40069							STEAP4	EMCN
PBX4							TECPR2	ESAM
SIRPG							TLE3	ESM1
THEMIS							TNFRSF10C	FAM124B
TNFRSF25								HECW2
TRAT1								HHIP
								KDR
								MMRN1
								MMRN2
								MYCT1
								PALMD
								PEAR1
								PGF
								PLXNA2
								PTPRB
								ROBO4
								SHANK3
								SHE
								TEK
								TIE1
								VEPH1
								VWF

## Sheet: Metaclusters
Tumor-cycling	Tumor-intermediate	Tumor-infiltrated	Tumor-myofibroblasts	Stroma-A	Stroma-B	Necrosis	Muscularis propria	Lymphoid aggregates	Nerves - arteries	Normal colon epithelium
BAIAP2L1	KRT8	PHGR1	ANP32E	VCAN	MYL9	CXCL8	COX18	SEPTIN1	NMT2	STX4
CDX2	CDH1	LGALS4	CHCHD1	SULF1	C1R	FTH1	PHETA1	CD27	SEMA3F	TSNARE1
CENPV	FXYD3	CLDN7	SRRT	AEBP1	ACTA2	TREM1	FMN1	WDFY4	TEPSIN	IGFBP2
MARVELD3	LGALS4	FABP1	UQCC3	LGALS1	IGFBP7	AQP9	CMTM8	TRBC2	AMZ2	BTN3A1
HSD11B2	RACK1	EPCAM	ARF3	BGN	FLNA	PLAUR	RAP2A	LTB	NGLY1	WHAMM
FAM83G	PPDPF	PIGR	G3BP2	SPARC	CAVIN1	BCL2A1	SRSF8	CD79A	COG2	ZC3HAV1
HDHD5	ST14	TSPAN1	AURKAIP1	COL6A3	TAGLN	S100A9	BLOC1S4	CORO1A	KATNA1	TULP3
RPF2	TSPAN8	KRT8	GOLPH3	MMP14	MXRA7	S100A8	C22orf39	PPP1R16B	ZNF337	FAM168A
C1orf116	AKAP1	GOLM1	HNRNPUL1	FSTL1	TPM2	IL1B	PRC1	FCRL1	TERF2	NUDT14
RNF138	EPCAM	CDHR5	BANF1	COL1A1	COL6A2	G0S2	RNF215	PTPRC	COA6	PCNT
LRRC45	LAD1	ELF3	CLPTM1L	FBN1	C1S	SLC11A1	ITPKC	POU2AF1	LANCL1	ERCC2
FRK	CDH17	GPA33	CRELD2	LUM	EMILIN1	ADM	EED	TBC1D10C	ELP3	POLE
LBR	TFF3	FXYD3	ARGLU1	VIM	CRISPLD2	CCL4	CARNMT1	CD37	CTU2	LRP8
ATG16L1	SH3YL1	CDH17	SNRNP70	MMP2	LGALS1	MMP1	MON1A	DOCK8	TGIF2	UTP25
ADK	ANXA2	MUC13	RNF213	EMILIN1	SELENOM	CCL3L1	CAMTA1	IKZF1	BBS2	HDHD5
RUNDC1	MARCKSL1	MUC12	TARS	C1R	LAMA4	FTL	GNPAT	TRAJ28	CDK2	ZSCAN9
OTUD3	PPP1R1B	TSPAN8	TRADD	IGFBP7	COL6A3	ITGAX	BANP	JAK3	MARVELD3	ZNF607
MTRES1	ATP1B1	CDH1	UBXN6	C1S	DCN	IL1RN	PAXIP1	ZAP70	LIPH	SIAH1
C6orf136	RAB25	KRT20	NME3	TIMP3	CALD1	SLC2A3	RNF169	SPOCK2	PLGRKT	ABCB6
POLR1E	COX5B	DUOX2	TYK2	NNMT	COL3A1	OSM	FOXD2	ARHGAP9	TMEM167A	SMYD3

## Sheet: Stromal Subclusters
Stroma A1	Stroma A2	Stroma B1	Stroma B2	Stroma B3
LRRC45	CTHRC1	PLBD1	SYNM	IL1B
REX1BD	AEBP1	MTRES1	SYNPO2	CXCL8
SPG21	THBS2	COMMD8	SORBS1	CXCL5
TMEM50A	COL1A1	ODF2	JPH2	NAMPT
PSMC5	CTSK	UGGT2	KCNMB1	G0S2
AGPAT3	COL5A1	SFSWAP	ACTG2	FTH1
TMED9	ADAMTS2	PITPNM2	DES	CSF3
SLC35A4	FBLN2	TYW3	PPP1R12B	S100A9
MTPN	SULF1	CENPE	AKAP6	OSM
CAPN2	COL11A1	KAT7	CNN1	S100A8
RNF145	POSTN	LMTK2	TNS1	MMP1
SON	ARL4C	CCDC77	LMOD1	CXCL3
CTNNB1	HTRA1	IFT88	RBPMS2	ADM
VCP	LRRC15	MBOAT1	MYLK	SOD2
RBX1	ANTXR1	PRIM2	KCNMA1	ANGPTL4
AP1G1	COL12A1	COQ10B	PGM5	IL24
SEC61A1	TAFA5	CCDC117	PLN	IL11
TUBGCP2	COL10A1	FZD6	SPEG	PLAUR
LAMTOR1	CDH11	ZNF248	MAB21L2	ERRFI1
SPATA2	ADAMTS12	NDUFAF4	CHRDL2	TREM1

## Sheet: Other ANXA1-related signatures
Ogden_REC	Ogden_iREC	Serra_YAP	Gregorieff_YAP_DOWN	Gregorieff_YAP_UP	Ayyaz_RSC
KRT17	SAA1	PHLDB2	SOAT1	SERPINB9B	ANXA1
KLK10	CXCL10	DOK2	BRCA2	LY6C1	CLU
S100A2	ISG15	CA2	PGAM2	GGTA1	MIF
S100A4	CD74	LAMC2	B2M	SYT8	NPM1
ANXA1	RARRES3	CDH16	NNT	PSCA	CCND1
KRT6A	HLA-DRA	SLC9A4	PTGR1	CTGF
EMP1	MMP7	PHLDA1	FRYL	CYP1A1
LGALS1	HLA-DPA1	P2RX2	AHCY	KRT80
PI3	HLA-DRB1	SYDE1	BC017158	MSLN
GPRC5A	TYMP	EPHA2	ATP1B1	TM4SF1
CD55	HLA-DPB1	CALCB	DYRK1B	ANKRD35
C19orf33	IFI6	RND1	PTPLAD1	ZFP185
MMP7	HLA-DQA1	SLC7A11	H2-Q10	IL33
KRT7	WARS	CHRNB1	KLHL8	WNT7A
F3	CXCL11	IL33	ASPH	PLAU
CDA	HLA-DRB5	ADAM8	TTC39A	EHD2
TM4SF1	SAA2	TLN2	CEP78	CALCB
IGFBP6	IFIT3	PTPRT	GLB1L	HPCAL4
LAMC2	IDO1	PSCA	LPAR5	AKAP2
CSTB	HLA-DQB1	MYOF	IFITM2	AF064781
SLC2A1	PSMB9	ZNF185	GCAT	FGD3
RHOF	IL32	SLC25A48	5031425E22RIK	SYDE1
PLAUR	ISG20	TM4SF4	PTER	NID1
ERO1A	TFF2	EREG	PSME2B-PS	MNDAL
KRT19	CCL5	LGALS3	AMACR	LOR
LAMB3	HLA-DMA	ABCC5	ENTPD7	LY6C2
CDKN2A	GBP1	AMOTL1	CTSA	P2RX2
PLEC	IRF1	MBOAT1	ZFP768	BTN1A1
CALB1	PI3	HSPA1A	SYCP3	YAP1
CRIP1	LCN2	LYNX1	D2HGDH	ILDR2
S100A16	TAP1	GPRC5A	PRKAG2	WWC2
LMO7	UBE2L6	ANXA5	MRPL34	EDN1
S100A10	MX1	LY6S	ABL1	CLIC3
AHNAK	BST2	SERPINB5	BCKDHA	CRYAB
KRT16	IFIT1	GJB4	NDST1	SYT16
SLPI	BIRC3	RHOD	RXRA	SLC25A43
ASS1	OASL	FOSL1	OIT1	PLAT
ADIRF	STAT1	CYP1A1	TIPARP	AMOTL2
TACSTD2	LY6E	PEAR1	CXXC5	ARHGAP22
CAV1	APOL1	C17orf97	GM7889	FGF15
MAL2	TNFSF10	MDFI	SLC9A5	JUB
LMTK3	RNF213	UNC13D	PKIG	ADAM8
HES4	PDZK1IP1	OXCT2	GSTT3	LY6A
ANXA2	B2M	LAMA3	DEFA22	39509
SDCBP2	TGM2	PAQR8	TMEM20	UNC13D
ISG20	ANXA1	MCAM	TNFAIP8L1	AHNAK2
S100A14	IFI44L	SLC35E4	ZFP273	SLC12A4
S100A11	IFIT2	DUSP9	ZFP101	CDH16
SERPINB5	IFI27	F3	ABHD14B	WFDC2
LAMA3	HLA-B	CAPN2	FAM123B	GJB4
FTH1	GBP4	GNGT2	FADS2	CYR61
KLK6	PARP14	S100A6	SLC25A44	2610019F03RIK
MSLN	HLA-E	CLU	SHMT1	MTAP6
FLNA	OAS3	GLIPR1	SDHD	PLAUR
PLA2G16	CXCL1	PTRH1	SLC16A6	I830012O16RIK
CD59	NFKBIA	EDN3	ABCB1A	SYNPO2L
ISG15	RSAD2	GJB3	PCSK1	GCNT1
DUSP5	EPSTI1	SGK2	UXT	TCEAL7
TSPAN1	ASS1	MRC1	AQP3	ARHGAP23
ITGB4	HLA-F	KLRG2	1700029I15RIK	RASSF8
MALL	IFI35	EMP1	MAN1A	CLU
EZR	PLAC8	ACOT9	VPS13D	DUSP14
RHOD	UBD	TRPM6	GM1840	SPRR2A2
KRT6B	OAS1	ANO1	LPIN1	2310002J15RIK
PMEPA1	PSME2	ARHGAP22	PREPL	SPRR2A1
TNNT1	SOD2	PDLIM2	NME3	ANO1
SFN	S100A2	S100A11	HDDC2	ANXA3
CLIC3	MIA	TSPAN4	PEX1	GM17244
KRT18	LAP3	RBMS1	TMEM19	EPHA2
CXCL8	HLA-C	HPCAL4	METTL7A1	VNN1
SLC6A8	C3	ARHGAP40	ZFP950	ATP11A
PDZK1IP1	OAS2	LDHD	CMC1	STBD1
TMBIM1	CXCL8	GCNT1	APCDD1	PTRF
S100A6	C15orf48	SYT12	GUCA2A	SPRR2B
CAV2	XAF1	S100A16	ALOX5	RRAD
NDRG1	KLK10	SUOX	MTERFD3	ZFP37
PRSS3	GBP2	ANXA8L1	BCL11A	IFIT3
GCNT3	IFITM3	CXCL16	GMDS	SYT12
PLAC8	MT2A	LAMA5	PGBD1	XAF1
AKAP12	PLAUR	FGF19	PLEKHF1	ARHGAP40
MUC13	IFI44	NBL1	1810046J19RIK	BMP2
MT2A	MUC5AC	MSLN	MS4A8A	SERPINB9
CLTB	SAMD9	AHNAK	BPNT1	PHLDB2
SERPINB1	CXCL3	PMP22	MYL6B	2010109I03RIK
SEMA3B	IFI16	WWC2	D4WSU53E	PCOLCE
TMSB10	CXCL2	CLIC3	ANO9	GNGT2
EPHA2	SPATS2L	ANXA1	SLC27A4	AHNAK
PRKCDBP	PARP9	SERPINB9	BTN3A3	FABP3
COL17A1	S100A9	ANXA8	NPC1L1	SPRR2A3
ITGB1	DDX60	PCOLCE	SEMA4G	RSAD2
TRIM29	KRT17	EHD2	ZFP125	USP18
KRT8	APOL6	SH3TC2	WEE1	DPCR1
CST6	IFITM1	SYT16	MPZL1	LAMA5
S100A13	PSMB8	ZFP57	PSMB10	PMP22
SFTA2	CAV1	IL1RN	FAM115C	CXCL10
ABHD2	HLA-A	AREG	CFTR	HIST1H3C
FLNB	HLA-DMB	KRT7	1110034G24RIK	RBPMS
CYSTM1	PLSCR1	NID1	IL17RB	GPRC5A
CTSE	KRT7	ANXA3	ACSL1	1700056E22RIK
FSTL3	TNFAIP2	HSPA1B	ZFP759	OXCT2B
TIMP2	CDKN2A	SLC12A4	SLC22A4	AMOTL1
IFI6	MXD1	METTL7B	EHF	RND1
AC068491.1	TAPBP	SYT8	GM3776	STK32C
TYMP	ZG16B	SLC25A43	MLEC	TINAGL1
APOL1	NOS2	ZFP37	ATP6AP2	A430105I19RIK
MT1X	PSME1	NPNT	BARX2	SLC7A3
RHOC	SAT1	AKR1B10	GM10108	JDP2
GUK1	TAP2	S100A14	SH2D7	DUSP1
RAMP1	PSMB10	RASSF8	GCDH	IER3
C12orf75	ICAM1	KLHL13	GM10639	GM17237
SH3BGRL3	ANXA2	KRT23	MATK	LHFPL2
BIRC3	MUC1	SH3BP5	MANSC1	MX2
EPS8L1	CMPK2	ASAP1	KDSR	2310002L13RIK
MXD1	CALB1	CRIP2	OSGEPL1	TEAD4
EFHD2	TSPAN1	TEAD4	PIK3R1	GM16721
TPM2	C19orf33	S100A4	A930001N09RIK	FOSL1
PHLDA3	CEBPD	BICD1	GM10311	RNF208
DCBLD2	PMAIP1	ILDR1	CD38	KRT7
FXYD5	CTSS	ITGB6	DAB1	LAMC2
MIR4435-2HG	DUOX2	WFDC2	KLHDC9	CLCA6
JUP	APOL2	LHFPL2	HEATR7B1	FAM129A
GPX3	S100A11	ANKRD35	1110001J03RIK	ISX
CEACAM1	IRF7	TREX2	COX7B	APOL9A
BRI3	SAMD9L	VNN1	CPHX	CAPN2
FHL2	CCL20	RHOF	HIST1H2BC	MYOF
CXCL16	SP100	PLAUR	DGAT2	ISG15
CDKN1A	SERPING1	WNT7A	PRSS41	WWTR1
C4BPB	PML	TM4SF1	UBE2CBP	DDX60
CAPG	GCNT3	PLAU	SCAMP1	ANXA1
SAT1	SLPI	GML	GPLD1	STX11
S100P	KRT19	DLK2	SLC12A7	HSPA1B
EMP3	IGFBP6	CWH43	SH3BGRL	GLIS2
CAMK2N1	DUSP1	JDP2	GLCCI1	HDAC7
AHNAK2	ETV7		2610021A01RIK	EPN3
NEAT1	GABRP		ANXA13	PTPN14
IL18	TNFAIP3		FBXO48	APOL9B
PRSS22	GBP3		DHCR7	NT5E
DUSP4	DUOXA2		C8G	RNF39
QSOX1	CD47		PHLDB1	2310007B03RIK
HEBP2	RP11-338I21.1		GRK5	GM10393
LCN2	MX2		POLG2	S100A14
IL32	LAMB3		FBXL20	LGALS3
ADAM9	BATF2		TMEM97	PLK2
CXCL1	MIR4435-2HG		TOMM40L	PAK6
UPP1	ODF3B		ARHGEF26	KLRG2
TNFRSF12A	CTSE		ERN1	GM10972
HMGA1	LGALS1		FERMT1	SPON1
RRAS	IFIH1		RNF167	SLC5A5
MYH14	S100A4		ATP7B	THBS1
METRN	SFTA2		COX7A2	RIN3
ITGA3	IGHA1		GM7861	TGM1
PHLDA2	CTSC		MATN2	CHRNB1
DSG2	RRAD		RAD54B	PCSK6
AGPAT2	PMEPA1		SCRN2	CNN2
MYOF	SECTM1		CEP68	HIST1H1E
TIMP1	GPX1		AGT	DNAHC2
BCL2L1	VAMP5		1500035N22RIK	OMP
KCNK1	S100A6		CYP2J9	AKAP5
CFD	TACSTD2		SESN3	OAS3
RARRES3	LGALS3BP		SYDE2	IFIT1
ITGA2	NFKBIZ		HIST2H2BE	NBL1
PDXK	OPTN		RABGAP1L	ABCC5
MUC1	PLAU		FAM98C	ATF3
RP1-122P22.4	PRKCDBP		PDE3A	FBXO24
PHLDA1	BBC3		BET1	SLC35E4
ANXA11	TRIM22		ABCC2	HMOX1
DDIT4	CAV2		PCP2	SLC6A14
TPM4	IFNGR1		NETO2	NRIP3
EFNB2	LAMA3		YIPF1	CISH
PPP1R14B	TRIM31		RGS13	LATS2
KRT80	GSDMD		STAP2	CRIP2
LY6E	ZBP1		CBX8	ILDR1
KLK11	CASP1		CHRM3	SORBS2
C4orf3	SP110		DGAT1	MRC1
SSFA2	C19orf66		FAM183B	ZMYND15
FOSL1	SERPINB1		TBC1D4	CAV2
JUND	CXCL16		BPGM	FAM55C
ACTN4	PLA2G16		DHRS1	DUSP10
DSC2	PPP1R15A		SCD1	HSPA1A
MISP	GPRC5A		BCL2L15	D14ERTD668E
TINAGL1	SOCS3		SIGLEC5	LAMB3
SAA1	TMC5		TTC23	DLK2
TFF1	CFLAR		IDH1	MYO1C
CCND1	CARD16		MAP4K2	MMP23
CTSD	SDC4		D14ERTD449E	1110032A04RIK
IFI27	USP18		UQCR11	PDLIM2
PCLAF	NUB1		LCLAT1	FLNA
C9orf16	CSTB		UQCRH	ANXA8
SULT2B1	TM4SF1		BCL7A	LAMB2
RP11-48O20.4	IGKC		TRAK1	EMP1
PLXNB2	SDCBP2		TCF4	MRAS
DHRS9	ADAR		MORN2	PRL2C3
GJB3	NT5C3A		GPAM	BCAM
ANXA3	LTB		AMBP	IL1RN
CEACAM6	LGALS9		GATSL2	TIMP2
CAPN2	DDIT4		SLC16A13	FAM189A2
PDLIM7	CYSTM1		BCL11B	DOK2
PTTG1IP	ZFP36L1		ARSB	KIFC3
PITX1	MUC13		CCNJL	NPNT
MET	NMI		GM239	A230065N10RIK
PLAU	UCA1		NR3C2	SMTNL2
SPINT1	KRT6B		LRRC56	CLCF1
AQP5	MYEOV		WIPI1	TNFRSF12A
CIB1	STAT2		BAIAP2L2	KLHL13
SPATS2L	VAMP8		RCBTB1	2310014H01RIK
TSPAN3	TRIM69		CUEDC1	ZBP1
LIPH	DTX3L		XKR9	TREX2
HSPB1	PARP12		CENPP	CXCL16
BHLHE40	LMO7		SLC7A4	ZFP57
BMP4	LYZ		AMPD3	GM17622
TNFRSF21	HELZ2		GM14410	SLAMF9
ACTB	FTH1		DEFA20	S100A4
SERINC2	NCOA7		VTI1B	PPP1R2
CRB3	ZC3HAV1		USP49	GM14446
LMNA	NAMPT		FCHSD2	RIN1
YWHAZ	ZFP36		9130230L23RIK	ADM
GSTP1	KRT8		NEIL3	SLC9A4
PERP	TNIP1		GOLM1	ARHGAP29
CYTOR	CDC42EP1		TEC	CSRNP1
GPX4	CP		DHRS11	NR4A1
FSCN1	HERC6		4831426I19RIK	EMP3
VDAC2	FLNA		MDM1	LDHD
HN1	S100A10		CCBL1	SPRR1A
MDK	TMSB10		ALDH3A2	2010002M12RIK
FAM129B	RHOC		D130043K22RIK	SLC25A48
RBCK1	KLK6		TXNDC5	BEX1
LGALS3	TRIM29		UPP1	CD55
SUN1	CDA		ENTPD8	ADAMTS15
CD81	GSDMB		AI467606	CDKN1C
SLC16A3	RIPK2		TRPM5	PEAR1
PLCD3	LINC00152		NR1D2	DUSP9
OPTN	C9orf16		RPA3	SLC7A11
KLF2	MAP3K8		SLC30A1	SERTAD4
C4orf48	EREG		WBP1	SH3TC2
GPX1	ANXA5		GSTA1	SEMA3C
SLC20A1	SAMHD1		GLA	WWC1
TCEB2	AIM2		GM2104	MYCBPAP
RNF145	NEAT1		GM10395	F3
PKM	EIF2AK2		GM9780	TRPM6
CAST	LAMC2		BC066135	ADAMTSL4
MUC17	PKM		RNF43	EMP2
ARPC1B	ZNFX1		FOXO4	PPP1R15A
LINC00152	CD55		TPPP	LYNX1
DMKN	EFHD2		ARMCX1	PRSS23
GSN	LIPH		ST3GAL1	LAMA3
MYEOV	TNFRSF14		1110021L09RIK	RHOD
PTPN12	CD59		TNFRSF19	WTIP
TGM2	MDK		ALCAM	PARD6B
HPGD	NLRC5		GRAMD1C	1700019G06RIK
NDUFA4L2	RHOF		EPHB2	CIDEC
ARF6	SQRDL		FUCA1	HBEGF
REEP3	HES4		PRPS2	SGK2
IGFBP3	PRRG4		NRGN	HIST4H4
SDC4	RRAS		ATP10B	BASP1
GTF2A2	TMBIM1		GDE1	TPM2
CCK	ERO1A		DEPTOR	CAMK1
C1orf106	MALAT1		ZFP873	ACOX2
CTC-251H24.14	SERPINB5		CLYBL	BMP8B
FAM3C	PHLDA3		BCL2	E130012A19RIK
NFKBIA	SFN		STMN1	ADM2
AGRN	SLC6A14		SLC7A9	GM10691
PMP22	UBC		ZBTB38	RASGEF1B
RAC1	ANXA11		CDC73	TLN2
STK24	CX3CL1		JAKMIP1	ARC
ATP1B1	MYH14		REEP6	OASL2
B4GALT1	BIK		CEBPA	PDZK1IP1
ECM1	CDCP1		ACAD12	ITGB6
SDR16C5	LGMN		IFI30	VANGL1
C6orf132	NECTIN2		ALDH18A1	DUSP3
TMC5	FOSL1		IL11RA1	CCDC120
NT5E	PLEC		FUT8	MBOAT1
INF2	CASP8		GOLT1A	CCDC68
CYP3A5	SQSTM1		TMEM42	TUFT1
ATP6V1F	SHISA5		MAST3	ECEL1
GAPDH	ANXA3		CYP2C65	FAM46B
ZFAS1	SLFN5		ULK1	ID3
EDF1	CLCF1		TCF7	CAR2
IL1RN	GUK1		DPPA5B	VGLL3
RBP1	CLIC5		ERO1LB	KLF6
GALNT1	ITGA3		PHLPP2	S100A11
TUBB	LIF		SLX1B	S100A6
MYL12B	CASP4		ACRBP	ID1
CD68	C4orf3		NUDT12	ISG20
MIDN	PIM3		SLC35A3	SUSD2
CDCP1	CFB		CCDC28A	CAPN5
UBE2S	XDH		PCMTD2	GML
UCA1	JUNB		INSIG1	ABHD2
IGHA2	RTP4		PPT1	SLC5A6
LRRFIP1	RNF145		ATF7IP	PPL
TMEM54	PLXNB2		ALG6	PRKCDBP
NMB	CYBA		DCXR	KLF4
CD47	KRT18		ITGAM	TM4SF4
LENG8	S100A16		OCM	CLIC4
COTL1	PNRC1		MSRA	STON1
TMSB4X	RARRES1		PNKD	PMAIP1
FOSL2	RBCK1		ZKSCAN14	ALS2CR4
GNB2L1	PRSS21		LGALS2	DERL3
SPTBN1	AGRN		2900097C17RIK	PRRG4
DST	TPM2		GGT7	PPP1R9A
HSPG2	CCND1		BRP44	S1PR2
RND3	CEBPB		BTG2	ARL4C
RNF213	EMP3		CHGB	JAG2
DUOX2	ORMDL2		SCG2	1700016K19RIK
BNIP3L	PIGR		AK4	RASSF8
CTTN	DYNLT1		UPB1	ID2
NOP10	MSLN		LPGAT1	GM7008
BAIAP2L1	LINC00467		TNFRSF11A	RRAS2
ALDOA	PDXK		MS4A10	ARHGEF17
JOSD1	LMO4		CDCA7L	PRND
CLCF1	ITGB4		CASP3	CGNL1
SQSTM1	MAX		THA1	GM6096
LRRC8A	SOCS1		CYP2C66	1700019L03RIK
MYH9	NAPRT		FAHD2A	BICD1
UBA52	ADAM9		GIMAP1	MDFI
CARHSP1	TMSB4X		APLP1	AREG
MPRIP	CRB3		TYMP	GRASP
MZT2B	DDX58		AY761184	PTPN21
RIOK3	GSN		TMEM89	FOS
CDV3	AC068491.1		MMP7	PALLD
UBE2M	CCNL1		CYP2C44	KRT18
OST4	PARP10		SNX20	6030445D17RIK
ARPP19	TRIM15		RCCD1	SAMD9L
TMPRSS4	TNFRSF12A		STX17	OSBPL5
PPP2CB	COL17A1		SLC25A36	STEAP2
SIVA1	PHLDA1		LRRC26	RBMS1
ASPH	CDC42EP5		ZFAND1	CCL20
C19orf53	STEAP1		GM10967	CLDN4
CHPF	MYOF		TBC1D14	AKR1B8
ACHE	ARNTL2		MTX3	AGTPBP1
KLK7	CXCL9		UROD	IRGM2
RP11-783K16.5	TAX1BP3		FGFRL1	LMO7
ERRFI1	CEACAM1		INPP5J	PIM1
PFN1	CASP10		GM9994	TULP2
PLP2	MYL12B		NLRC4	PTRH1
FAM83H	TIMP1		TFRC	SH3TC1
SPTAN1	MSRB1		FAS	GM7665
SLK	IFITM2		NAPEPLD	ARNT2
CARD19	CARHSP1		BHLHA15	GADD45B
SH3KBP1	RAMP1		TRIM2	MAPK11
ONECUT3	SH3KBP1		ABHD14A	FAM160A1
TNIP1	KLF2		TOX3	MACF1
MUC5AC	HAPLN3		CYP2J6	ACOT9
DYNLL1	EZR		SPIB	GJB3
GIPC1	PRDM1		NIT2	PHLDA1
PFKP	KLF6		GRB7	LRRFIP1
TMPRSS2	IL15RA		FSD1L	PHLDA2
EIF1	TMPRSS3		TIAM1	SH3BP5
CLDN4	EPS8L1		GM15293	PLCD3
UBE2H	ATP6V0E1		GM14850	PAQR8
GALNT5	OGFR		FABP5	SLC44A2
LEMD1	RNF19B		SDSL	CHAC1
B2M	FLNB		HCK	PODXL
CKLF	TFPI		GM11048	ASAP1
TXNRD1	NR4A2		KLHL17	EDN3
CRABP2	KCNK1		GM5113	LITAF
IFI27L2	TSPAN3		DNM1	PTPRT
TOMM5	CCDC109B		ATP8A1	SERPINB5
KLF6	CD2AP		CBX7	ANXA5
RGS10	CAPG		GM10768	MAFF
DSP	PTGES		TMEM163	HERC6
PTRF	PDP1		EPHB4	TCTEX1D2
AMN	CRIP1		RPS28	FLNB
EPS8	ATP1B1		1700066B19RIK	RHOF
LYZ	SAV1		ZFP629	TSC22D2
ITPR3	CDKN1A		ATP6V0E2	IFRD1
GNB1	PDLIM7		FZD9	TRIM15
FAT1	C5orf15		CDX1	SSH1
ZYX	STAT3		DECR1	EREG
CYBA	BCL2L1		PYGL	RUSC2
CYB5R3	SMIM22		NMRAL1	RASSF1
TRIM31	GLIPR1		CASP1	STEAP1
PIM1	BCL2L15		RASGRP4	TRIP6
KRT10	MET		CD59A	SEZ6L2
OAS1	CALM3		GPR30	ACOT10
PIM3	DMKN		P2RY6	KRT23
HK2	DNTTIP1		ZFP932	TNKS1BP1
BIK	LYSMD2		NRTN	HIST1H2BJ
ZNF706	CCL28		TMEM8	PPARG
TAGLN2	PSMA4		4632404H12RIK	OASL1
DDA1	KYNU		KHDRBS3	FAM59A
UBR4	TAPBPL		CHDH	PLEC
LIF	CNDP2		CAMK4	SMAD7
DDR1	TRIM56		FAM73B	ARID5A
TMOD3	DRAP1		H2-Q2	RTP4
TMEM45B	GSKIP		AI118078	1700012L04RIK
RAP2B	BTN3A1		HSD17B4	CWH43
USP53	HN1		TMEM64	DENND2C
POLR2L	RND3		TC2N	PWWP2B
DYNLT3	SLC16A3		FTH1	CNKSR1
IFNGR1	TXNRD1		GSTA3	TCTE2
VAMP8	COX17		TMEM132A	GLT28D2
EIF4EBP1	PRSS22		GM6570	TMEM188
PDLIM5	PYGB		ANKRD22	METTL7B
CDK2AP2	TNFRSF21		FMNL2	GLIPR1
SPNS2	TMEM208		ACAA1A	TJP1
PLEK2	TMPRSS2		TMTC4	1700047I17RIK2
OCIAD2	ITGA2		CHGA	GRB10
INO80C	UBE2Z		GM6665	EGFR
ZFP36L1	LMTK3		PLCH1	DHX58
ARNTL2	SH3GLB1		MOCS1	NEU1
FA2H	BHLHE40		CCRL1	CRLF3
MYO1E	TXNIP		KSR1	TRIB3
SVIP	TCIRG1		SLFN9	HPSE
NBL1	FBXO6		PISD	STC2
NECTIN2	SBNO2		NR5A2	ANGPTL6
TFF2	ATOX1		ZHX3	FAM43A
CHP1	RHOD		QDPR	ARID3A
SERF2	CD82		GM17553	GDF15
ELOB	CLDN7		ETV5	DUSP8
FAU	MYL6		MDH1	TGFBR2
P4HA1	MAP3K13		ARG1	PAM
RAB10	DDX60L		VEGFC	FAM83H
CRIP2	NOP10		UGDH	OTUD7B
VAPA	SPAG9		ATPIF1	PGAP1
EGLN3	CIITA		HMX3	PVR
SEMA4B	GADD45B		ALOX5AP	IL28RA
SEC61G	MYL12A		PCNX	S100A16
CFLAR	EMP1		LIPG	RAPH1
TAF10	XRN1		NRG4	5730528L13RIK
BAMBI	IGHA2		NAPRT1	OTUD1
F2RL1	CTSD		XKR5	IFI27L1
GNAI2	CEACAM6		CLIC6	PLEKHG3
PXN	HSPB1		2810432L12RIK	TSPAN4
RALA	ERAP2		MTCH2	KRT14
FGFBP1	NT5E		EXTL1	KCTD10
PLS1	MOV10		FAM78A	KCTD11
CDC42EP1	BTN3A2		9530008L14RIK	PCYT1A
YWHAG	SPINT1		PXMP4	IL3RA
CTNND1	RALB		E330009J07RIK	H2-T24
NENF	DUSP5		ARHGAP9	NCRNA00085
OAS3	HEBP2		MGAT3	TBC1D2
GAL	APOL3		GM15308	MYO1H
C1orf116	GDA		GM885	CAPN13
AES	BAK1		ZFP799	KRT16
MZT2A	ENC1		RNF32	FLOT2
PLIN3	DESI1		SLC35F2	TAGLN2
GDA	PPIC		RNF186	RAPGEF2
SNX9	GTF2A2		GDPD2	SUOX
CDKN2B	IRS1		2200002J24RIK	PDGFB
KIAA1522	AHNAK2		ARRDC3	BAIAP2
CLIC1	TINAGL1		ETV4	MCAM
LLGL2	PSMA6		MARCKSL1	KRT9
AVPI1	CAPN2		ZFP810	NCEH1
TAX1BP3	CYTOR		BTD	OSBPL3
MBD2	SAR1A		GM10029	KRT17
MIB2	H1F0		3110057O12RIK	ALPPL2
MYL6	CSRNP1		PDK1	EID2
PPARD	GOLM1		CD74	SPIRE1
IGFL2	PITX1		CELF3	IGTP
TPT1	NGFRAP1		SYNPO	EPHA4
ZDHHC12	ABHD11		NOTCH1	SLCO2A1
PPP3CA	LMNA		TEX9	F2RL1
GBP3	ARF4		TSPAN3	DUSP18
CD82	GRINA		GPR35	MYADM
TMEM258	LMF2		TMEM59	TNFRSF21
MIF	TM4SF18		PANK3	CCDC85B
GTF2I	MROH6		UNC93B1	TSPAN6
COX17	CCDC68		GUCY2C	CCRN4L
ARPC1A	DPP4		2210415F13RIK	SLC45A3
AHR	TMEM45B		ZFP41	FRMD4B
PPP1R15A	PRSS3		ZFP362	LAMC1
NPEPPS	SP140L		FAM109A	SUSD1
LDLR	CAST		CTSS	B430305J03RIK
BEX3	NFKB2		GM9222	HSD17B2
ASAP2	PALLD		EXPH5	ANXA2
UGCG	MALL		ABCG5	AA986860
TICAM1	RNF149		EPB4.1L3	KRT19
UBE2C	ATF3		DEFA26	FAM101B
KTN1	CKLF		TGFBI	KRT8
F11R	LRP10		TM7SF2	PRKX
BST2	MT1E		MID1	PTPRR
COL6A1	UBE2L3		PLXNB1	EPB4.1L1
SH3GLB1	HSD3B7		CPN1	MYO1E
MT1E	EIF5A		PLA2G2F	NGFRAP1
SLC22A18	FGD6		FAM13A	OAS2
TJP1	TCEB2		SMPD3	ST6GALNAC4
TXN	CTD-3252C9.4		CLEC2D	ARF2
SLC6A14	MFSD12		VKORC1	RAI14
MFGE8	RHBDF2		SLC34A2	PIK3CB
ARL4C	NDUFAF3		CYP4V3	K230010J24RIK
CDC42BPB	SYNE2		TNIK	STK10
MACC1	KRTCAP2		1700025G04RIK	KRT42
VEGFA	TIMP2		PVRL1	GM10129
MYEOV2	ZC3H12A		HDAC5	DDAH1
FBXW5	TCHP		DEFA25	TMEM43
FAM102A	C1R		MCTP2	TUBB2A
ENO2	EPS8		1110002B05RIK	BC025446
APLP2	EGLN3		HES6	GAS2L3
RRAD	CALB2		SHPK	DUSP8
PCBP1	RELB		BMP7	RAP2B
HEPH	RAB27B		PKDCC	SNAI3
TPM3	TNFRSF1A		BC049352	PORCN
PPP2R2A	DNAJA1		ISOC2A	KANK2
TRIOBP	TPMT		RNASE1	2010109K11RIK
LAD1	CD68		NARF	1600029D21RIK
SAV1	ARF6		AKR7A5	LMNA
SDC1	CALR		SLC25A23	UAP1L1
UNC13D	TRAFD1		ANKLE1	EZR
VASP	RNF181		INSL6	TMEM62
UQCR11	MUC4		FAR2	PSAT1
PNPLA2	EHD4		TMED6	FAR1
ESYT2	DCBLD2		TEX9	SULT1C2
SEPW1	TNFSF9		CITED4	CAPG
PFDN5	CIB1		ABCB1B	MOSPD2
BACE2	CLTB		PDK2	RHBDF1
MALAT1	S100A13		FCAMR	FAM38A
DIAPH1	HMGA1		CCNB1IP1	NPFF
BLVRB	IL1RN		UGT2B35	GM5129
RHEB	B4GALT5		COX7C	CDC42EP3
IRF7	EDF1		SLC25A34	XPNPEP2
SERPINB6	IL18		CYB5R3	GM17541
ELOVL1	F3		GCHFR	PXMP2
SLC7A11	TMEM54		BNIP3	TEAD1
AP3S1	ARL4C		SLC15A1	1700069B07RIK
MRPL14	RABGAP1L		1600014C10RIK	2810008M24RIK
MRPL41	FKBP2		MXD4	BCL2L1
CTSB	EFNB2		GJB1	GSDMD
CDC42EP5	SLC15A3		B4GALNT4	9930012K11RIK
RALBP1	TCF7L2		PAPLN	TRIM46
FUOM	TNFSF13B		PFKM	TNFRSF10B
DUOXA2	BCAR1		FAM132A	PRKCI
MAP3K13	CLDN1		4933422H20RIK	CDKL5
GLRX	JAK1		CLEC2E	ENDOD1
ABCC3	TMEM50A		D930015E06RIK	PDP1
RHPN2	CD63		AZI1	IFIT2
PKP3	RBX1		HDAC11	STRN3
TSPO	BRI3		CML5	NFIL3
RER1	COTL1		RAB3D	NEK8
PTP4A2	EPHA2		GM9705	PACSIN3
NSMF	RP11-670E13.6		GAL3ST2	MYH14
DRAP1	SPTBN1		5730469M10RIK	SQSTM1
EPS8L2	S100A14		GNPDA1	ENPP3
IDS	LACTB2		MUC4	ACTB
UNC93B1	PTPN12		EFNA1	PLEKHG2
CLIC5	PLA2G2A		PPM1J	GAS8
ARFGAP3	UBE2D3		SIAE	GADD45A
NR4A2	YPEL5		SYKB	TMEM140
CHMP2B	MST1R		SEPP1	PGAP1
TMA7	PHF11		KLKB1	CDON
EHBP1L1	PCGF5		APPL2	SLC25A4
PGAM1	MAFF		GLB1	ABL2
WDR34	SYT8		PDSS1	4930572J05RIK
PRAP1	UBA7		PIK3R3	GCH1
CAPN1	CTTN		D3ERTD751E	2310014L17RIK
PSAP	PHLDA2		0610039K10RIK	GM7334
PON2	RHOV		TMCO4	AIM1
MYO1C	PFN1		RASA3	SLC4A11
MDFI	TRIM47		PPARA	RAB23
MAFK	MYD88		YPEL3	AVPI1
ANXA5	TCF25		ARSG	GSN
MFSD12	JUP		ZC3H12D	HS3ST1
BTG1	S100P		EPHB3	PDZK1
FKBP2	CMTM7		SLC27A1	CCDC112
ATP5E	ARFGAP3		1110003O08RIK	HK1
TPMT	CTSA		ATP1A1	GPT2
SERPINE2	STMN3		1700040L02RIK	CDC42SE2
UBALD2	IGF2BP2		PDIA2	EGR1
PKIB	PFKP		ALDH9A1	MTAP4
SPINT2	LEPROTL1		TNFSF12	VSTM2L
SERP1	CHMP2B		DNAJB13	SLC22A23
DEFB1	PYCARD		DLL1	TMEM125
RRM2	FAM129B		DNAJC12	ABCC1
TNFAIP2	TIMM8B		MMD	PACSIN2
OCLN	FAS		2010011I20RIK	EML2
AKAP13	LSR		LASS6	SLC31A2
CDK1	FAM3C		DEFA5	ANLN
YBX3	AHNAK		GALM	TMSB10
TMEM167A	IFIT5		GM15315	CRYM
PTGS2	LITAF		ACPL2	TRIB1
ARPC2	ARRDC1		HEXB	MXD1
C19orf43	IRF9		SH2D6	UBTD2
TNFRSF1A	USMG5		GM7849	SLC10A2
EFNB1	AMN		RILP	MYO15B
AP2B1	HSPG2		CREB3L3	4930402H24RIK
CTSZ	SMAD3		SOCS2	FAM65A
ANKLE2	RP11-117B7.1		ZFP606	GM10020
IER3	FOSL2		ESRRG	4921536K21RIK
NBEAL1	STOM		PROSAPIP1	AGPAT4
FAM96B	BTG1		TNFSF13B	ARHGAP21
MGAT4B	CFD		ISOC1	SLC9A2
ATP6V0B	TRAPPC4		IFITM3	ZFP772
ATP6V0E1	PTTG1IP		PYROXD2	SHB
PPL	SRGN		TSPAN13	SDCBP2
ARRDC1	TICAM1		MTTP	AGRN
PLK3	MIF		GM15284	SGTB
MAPK6	MRPS6		SLC16A3	RNF13
MYO5B	FOXQ1		LRP2BP	SH3RF2
DYNLT1	HRASLS2		1110031I02RIK	BC022687
PARP14	TNNT1		CLDN2	ALDH1L2
MRPS6	REEP3		ACE2	TTLL1
RDH10	CNP		1700019D03RIK	SLC25A24
LDHA	PSENEN		2810459M11RIK	TRIM34B
VCL	EHD1		BC096441	CYP2W1
PCSK7	FSTL3		MOSC2	DDIT3
WASF2	CALCOCO2		SMPD2	GM98
CD2AP	JUND		SEC16B	PMEPA1
GPC1	STX4		SLC36A1	PPP1R13L
CDC42	VAMP3		RCOR2	2210011C24RIK
CD63	SULF2		THNSL2	A230050P20RIK
GNG5	BCL3		D630013G24RIK	2810474O19RIK
GNB2	CYB5R3		GPR56	NXNL2
CTSC	UBALD2		ACAD11	2900073G15RIK
ATP6V1G1	TM4SF20		ACAA2	TTC22
TCF7L2	ITM2B		ACER1	TMEM2
MAP2K2	CARD19		FAM158A	1810048J11RIK
LRP10	ANKLE2		TMOD4	NIPAL1
TM4SF20	CHMP5		CCL25	FAM107B
KCMF1	PCSK7		DDHD2	FEZ2
DNM2	SMCHD1		DEFA24	DIAP3
SOCS3	CLIC1		5033414D02RIK	TBX3
ANO1	C1orf106		STEAP3	EHD1
ADAP1	SGPP2		PSMB9	PARP12
VAMP5	BLVRB		SIPA1L2	PLA2G15
ST14	TAF10		SLC25A15	SASH1
HSPB11	ACHE		PFKFB4	MAN2B2
DNTTIP1	MTUS1		CDCA7	NXF7
INSIG1	TK1		MARCKS	PIP5K1A
LYST	HSBP1L1		TPH1	SBNO2
TXNDC17	MISP		SLC23A1	JUNB
B4GALT5	TPM4		NR1I3	EPB4.1L2
CSNK1E	SRA1		GSTT1	TSPAN9
KIAA0040	CYP3A5		2610008E11RIK	SEMA6A
SMAD3	SLC37A1		TMEM117	LRRC8E
PGLS	UNC13D		CYP4F16	KIF3A
PPP6R1	C4BPB		FFAR3	GM9775
TOB1	PDLIM5		MAFB	HIST1H4D
MAP4K4	TSPO		BST1	FLRT3
ABHD11	TOB1		1110020G09RIK	BTC
TUBA1C	LYN		GM8973	NUDT17
NR4A1	BLOC1S1		SLC12A2	CTSL
DDX17	LTBR		CES2G	6430598A04RIK
PICALM	PITPNC1		FAM117B	PAG1
CTDNEP1	JAK2		MBOAT2	CTNNAL1
OBFC1	IER5L		DNAHC8	RASL11B
ZFAND5	SLMAP		TMEM37	UBASH3B
CLSTN1	REEP5		LYVE1	NBEA
TM4SF4	SOCS6		GRAMD3	RNF19A
ORMDL2	TCEB1		CHEK2	USP46
TOMM7	H3F3B		RANGRF	SLC44A4
NAPRT	LAIR2		CELA1	CD276
GCHFR	GNG5		GALNT7	CCDC64
MLPH	RER1		EBPL	F11R
SEC61A1	IKBKE		NQO1	KAZN
HIST1H1C	STAT6		RAB43	GM17590
AP2S1	RNASE1		3930402G23RIK	ZFP568
SLC6A20	SPRY1		RETSAT	HIC2
DOCK5	PLIN3		CEP72	TLN1
RNF19B	VRK2		KCNF1	TPST2
MYL12A	SYNGR2		SESN1	DUSP5
AURKAIP1	PPP1R14D		PLAC8	TMTC2
HSPA5	PKP3		RORC	CMPK2
VEZT	VNN1		CC2D2A	WLS
GJB2	JAG1		SLC3A1	DST
NCOR2	RNF19A		HUNK	PLCD1
SMIM22	CLIP1		KCNE3	RAB8B
LTBP3	TXNDC17		CCRL1	PIM3
CALM3	PCBP1		LYZ1	IKBIP
PDLIM2	SERF2		GUCA2B	RDM1
FAM108C1	HK2		RCN1	ADK
HCFC1R1	RP11-350J20.12		NR1H3	CAR13
ADGRE5	ZDHHC3		1810014F10RIK	TPM4
MRPL55	ITPKC		TBC1D8	CFL2
MKNK2	TRIM38		PHYH	TMC7
SNHG7	TSC22D3		INSM1	SFXN3
ATP6V1D	TPP1		GM10260	SH3PXD2A
MLLT4	UNC93B1		CYB5	CGN
EEF1D	RRP7A		SRL	CRIM1
CNN2	FUT8		ANGPT2	COQ10B
ADIPOR1	PRKD2		ADD3	DDHD1
ATP2A2	NDUFB1		SLC25A35	ATG9B
PRDM1	PARP8		TNFSF13	RASL11A
FAM46A	IFI27L1		PRPSAP1	CDIPT
TUBB2A	DHX58		PLEKHO2	ZFAND2A
MELTF	HSBP1		AKR1C12	PCX
ATP5D			REG3G	BMP8A
SEC61B			BEND7	ENO3
TAPBP			DHRS4	PKP4
CDC34			SCP2	FLRT3
SGMS2			DDC	SLC40A1
DVL1			GPRIN3	DUSP6
AC090498.1			NKX2-2	KITL
FAM207A			SULT1D1	MPZL3
TMEM191B			GPX2	MGAT4C
AKT1			LHPP	EIF4EBP1
DUSP1			9130409I23RIK	PBX4
UBE2B			MACROD1	AP1S3
SPON1			TIFA	EIF4E3
ARF4			TMPRSS4	IGSF9
TAF1D			TSTD1	CD2AP
RNF7			AI464131	ZCCHC10
MX1			NDRG1	KCTD9
MCFD2			ASCL2	PGAP2
PPP1CB			CYP4F40	MARK4
HS3ST1			TMEM205	GM6788
OAZ1			CLPS	CRYZ
CTNNA1			9030617O03RIK	RHOB
IFNGR2			GREB1	LRRC51
FLII			KCNQ1	HSH2D
MST1R			GM15299	LY6D
WSB2			EFNA3	TNK2
PCDH1			SLC25A42	JUN
CEBPG			SCML4	TNFAIP1
POLD4			BTNL2	2200002D01RIK
APOL6			LRP4	SEMA3B
NQO2			FAM40B	DSP
KRAS			NAGS	MFSD7C
SUMO2			CYP2C29	TAX1BP3
UQCRH			SLC35E3	PTPRD
TMEM134			GPR128	EFHD2
IRF1			ABCD1	5430407P10RIK
IQGAP1			PHF21B	CAMSAP2
KLF3			RTN4RL1	EIF2S2
LAIR2			ZDHHC14	BLNK
CAPNS1			AMN	RUNX1
PMAIP1			1700024P16RIK	ATF5
MTHFD2			AADAC	ABCG2
TOR4A			SEC14L2	3830431G21RIK
ADM			SMARCA2	3110070M22RIK
CAB39			EPHX2	RNF213
BCAR1			LGI4	LARS2
MACF1			DACH1	SERTAD1
UBL5			CDA	SLC25A33
NR2F6			CAMK2N1	ADA
TNK2			GALNT11	IFT81
H1F0			TSPAN1	UPK1B
TMEM259			ALDH1A7	ESYT2
CLDN7			LY75	TADA3
ANGPTL4			HDHD3	LRRTM2
CGN			SLC18A2	LRFN4
PLSCR1			APOBEC2	ITGB4
PDP1			GM5549	H2-T22
CEP170B			ELL3	DTNB
VPS37B			ST3GAL3	ITPRIPL2
SREK1IP1			MS4A12	GM14137
PHPT1			GM8074	FLT3L
EHD1			PRODH2	TOR1AIP1
RCOR1			GM6696	IRF7
ABLIM1			ZFP704	SMURF1
NAA38			C4BP	KREMEN2
SNX3			LMX1A	CCDC104
TMEM160			DEFA17	BCL3
SEPT9			GLRX	IL4I1
PAM			2210407C18RIK	RRAS
MED15			ATP8A2	AGPS
CAP1			CD24A	SIK3
SPAG9			SYT13	ACTA1
EIF4A2			CLCA3	FUT1
ARHGAP5			HOOK1	OAS1A
CDH1			ALDH1A1	2310028H24RIK
CASP4			ZFP808	PPP1R12A
GDI1			8430419L09RIK	RDH10
B3GNT5			SERINC3	IMPDH1
VIMP			GM11016	METRNL
NT5C3A			MT-ATP8	ST3GAL6
RAB11A			HYI	MAFK
TRIM15			VAV1	S100A10
ECE1			A930039A15RIK	KDM3B
ATL3			A2LD1	8430427H17RIK
NDFIP1			DEPDC1B	MAPRE3
TXNL4A			HOPX	CHMP2B
HKDC1			CNNM1	GM9887
MAP3K8			FGL2	LARGE
PTBP3			CYP4F14	WDR47
SPCS3			RAD51L1	ACTN4
RNF149			GM15292	CLN8
MRPL52			TXNDC16	ATG16L2
CHMP5			4931406C07RIK	CACNB3
YWHAH			NIPSNAP1	UNC5B
ITPK1			CBR1	PRMT2
GOLM1			NOXO1	NKX6-3
SLC7A5			PINK1	SOCS5
ARHGAP27			TLR1	FADS3
MROH6			PRAP1	PVRL2
PSORS1C1			MYB	SLC23A3
TAGLN			POU2F3	PTPN12
KRT20			E030011O05RIK	TRIM16
DHCR24			GM11353	MLLT4
MAFF			CHCHD7	PLCXD2
RELB			ANKRD37	P2RY2
LPCAT4			RALGPS1	ITGAV
CD109			BTNL7	LMO4
SLC44A4			OMT2B	D15ERTD621E
IGKC			HSD17B13	39698
SLC20A2			ENGASE	ARHGEF18
METRNL			GM10104	NSF
RHOB			IGFBP4	NT5C2
STK39			1810049H13RIK	PDLIM7
RBX1			MEX3A	INF2
NCEH1			TRIM72	CCND1
TAX1BP1			CFP	CHKA
LSR			TRP53I11	HLCS
USMG5			CAPN8	4930539E08RIK
CCNI			CAR9	PPFIBP1
KLK8			CNDP1	TNFAIP3
ADAM15			SYTL2	BICD2
WSB1			BEX4	VMA21-PS
ADAR			OSBPL6	HSPA5
BBC3			HNF4G	TACC2
DESI1			CTSE	ROPN1L
MYRF			PRLR	THNSL1
TMEM106B			EFR3B	ALS2CL
SLC25A37			UGT1A8	DDX58
ANAPC16			SYPL2	CDKN1A
EPB41L1			GM9847	FOSL2
MUC5B			TEF	IGF1R
TNFRSF10B			SCARB1	IER5
PAK2			FOXA2	NEDD4L
YKT6			LRP1	PKP3
CALU			SLC6A7	MTHFD2
SUPT4H1			GM7092	ATXN10
SELK			UGT1A6B	GM527
WDR45B			UGT1A9	EPDR1
BSG			UGT1A10	LPCAT4
PLEKHA1			CFI	RP2H
CLOCK			1200009I06RIK	PTPN23
HRAS			UGT1A2	BCOR
MBOAT2			UGT1A5	SH3BP4
PSMG3			SLC27A2	GM16066
ZFAND3			UGT1A1	AW555464
CALM1			G630090E17RIK	PHF19
NPDC1			HABP2	SMPDL3A
SLC25A1			DNAJB3	IFNGR1
RHOG			PKLR	PARM1
STUB1			SMOC2	HSPBAP1
TYMS			GIMAP5	DSG2
DYNC1H1			FOXA3	GTPBP2
TMEM219			GPR22	ANXA7
UBE2R2			UGT1A6A	PLEKHH3
ANLN			DNAJC28	TMSB4X
CMTM7			RNF152	PEA15A
GNAS			CLDN15	PLXNA1
INPP1			GIP	AKAP13
LASP1			HADH	MTAP7D1
CD44			DEFA-RS7	NFKB2
SNU13			IRF8	XK
POLR2J3			ARRDC2	RHOV
R3HDM4			PTPN22	TLE6
BRD2			SYTL1	ITPRIPL2
JAG1			DPP4	GM5453
PRSS8			NPL	ABCC3
PCBP2			HPD	RPS18
IER5L			UGT1A7C	RAB31
MYO6			HACL1	ZFP385A
RAP1B			SLC17A4	AIM1L
SYT8			GM17635	NOS2
FKBP1A			EHHADH	PTAR1
ALCAM			DEFA-RS1	RG9MTD2
ITPKC			KIF12	TNFRSF23
SEC11A			LYZ2	SCNN1A
SLMAP			ACE	1700001C19RIK
MMP14			CAT	DCBLD2
RASEF			GCNT4	CLIC1
NPTN			AW112010	PMEL
YAP1			ITLN1	GNB5
SCARB2			FCGRT	CYP4B1
ZDHHC3			MGST2	PFKFB3
ATP2B1			ACP5	9130017N09RIK
POLR2J			GM7866	SLFN2
ARPC5L			PDE9A	ARL8A
LPGAT1			D18ERTD653E	VDAC2
LTBP4			BFSP1	3110062M04RIK
RABAC1			REG3B	PARVA
NMU			ITPKA	ABLIM1
CORO1C			ABCG8	RPS4Y2
DGAT1			SHF	CSF2RA
EEF1A1			CTTNBP2	BC029214
FAM173A			H2-T3	PYCR1
C1orf122			BCMO1	GM17636
IGF2BP2			E030010A14RIK	ARHGEF5
MYD88			ACOT4	CTNNA1
TRIP10			GDPD5	LUZP1
CNIH4			GLT1D1	ASCC3
DNAJC1			H2-Q2	CHST4
CHCHD5			MYCL1	MMP24
C14orf2			AXIN2	CTBS
PRNP			GSTM2	DNAJC5
TMEM147			NRARP	PRKCD
GLS			ACPP	CCNG2
PRELID1			HAGH	SDC2
WNK1			PER3	FZD7
GLG1			GHR	HIST1H4K
RP11-670E13.6			RNF144B	SNTA1
DPP4			AFP	C530008M17RIK
VKORC1			MNX1	DENND5A
CCDC107			FXYD3	SERPINB1A
PITPNC1			GRAMD1A	MED13
SLC12A7			CKB	RYK
STAT1			SPHK1	VOPP1
RAB25			CYP2B10	ESYT1
C11orf31			PPP1R1B	MVP
SNRPD1			SECTM1A	CAPN12
PLK2			ACSS1	GM12666
TRAM1			GFRA3	DOCK11
VMA21			RGS2	SGCB
SRP14			ATP2A3	STX1A
ACTG1			FAM53B	ABHD12
BRK1			NAV1	DGKA
SLC9A3R1			RRAGD	AP1S2
MARK3			SLC9A3	RHPN2
ITGB1BP1			2010107G12RIK	MTHFR
MAX			GALNT12	39701
SDF2L1			GM11074	FZD6
PGP			RAB15	ZSCAN20
PTS			S100G	MTAP
KDELR3			PIK3R5	RSAD1
ARL8A			THRB	ATP2B1
UBE2D3			TCN2	PTPN9
CLCN3			PYCARD	ACTN1
TNFAIP3			CYTIP	GM10462
JCHAIN			BC089597	MYCN
TES			GDPD1	H2-T23
WDR1			AQP11	MBP
MCL1			TMIE	TPM1
OXSR1			SVAL1	FBXO6
SRD5A3			MPZ	LRRC58
RAB11FIP1			TM4SF5	SLC7A5
IRF6			DMPK	SAT1
ITGB5			2310016G11RIK	ERRFI1
ABCA7			CYP4F13	MTMR10
SVIL			MLXIPL	PLEKHF2
TC2N			FMO4	SYTL5
MAP1LC3B			VIPR1	DOK7
UFM1			MAP2K6	TRAF4
CD9			H2AFV	C130074G19RIK
CEMIP			SEMA6D	TRIM40
C9orf142			PLOD2	ASNS
C7orf73			CES2H	EPB4.1L5
PPP1R13L			RAB27A	TCHH
TSPAN8			OTC	GM17527
INSIG2			ACOT11	HIST1H4C
WFDC3			TPD52L1	DDAH2
TMBIM6			GPD1	ACTG1
BZW1			VAV3	PHLDB3
SRSF9			E130116L18RIK	GYS1
POLR2I			1500009L16RIK	RIPK3
CAPZA1			1700019G17RIK	SUPT3H
BCL3			G0S2	NCOA3
CDK16			GM11992	OBFC1
SURF4			SLC17A1	POLD4
HSBP1L1			GM766	0610010F05RIK
CLDN1			APOL10A	HK2
SOX9			ARL4D	SLC26A11
BAIAP2			2010007H06RIK	INADL
AC005256.1			TMSB15L	CBFA2T3
CALM2			GM13318	ASAH1
CYTH2			SLC1A1	BC006779
TMCC3			CES2C	SFN
SERINC1			2210404O07RIK	MYH9
P4HB			ANG	CYB5D2
BLOC1S1			FAM19A3	NAB1
CTNNAL1			SERPINF2	ARL6IP5
MAPKAPK2			ALDOC	TTLL7
RNPEPL1			EPHX1	PIAS3
UBC			PON3	VEZT
HDLBP			PDZD3	1700016C15RIK
UBE2Z			KIFC2	GM10399
PPP2R5C			CPS1	HIVEP2
STEAP1			TFF3	INSL3
SAA2			FAHD1	WSB2
KIF1C			PLBD1	SPSB2
CCDC68			MFSD7B	FKBP9
MMP24-AS1			RGMB	CSGALNACT2
MAP2K3			UNC5CL	ZBTB37
PTPRH			GLYCTK	DUSP4
DSG3			BC057022	KCTD3
TMUB1			B3GALT5	MMP14
KRTCAP2			LRMP	PLD2
CENPV			SOX4	ERCC1
CAPN8			ADRA2A	GM6793
ARL6IP4			SLC37A4	GARS
SHROOM3			PRSS12	MAMLD1
WARS			FMO5	2900060B14RIK
RABL6			UGT2A3	RAC3
BCL2L15			GM9851	TPM3
TUBB4B			CES2D-PS	MIDN
IRAK1			NAT8	FBXW4
CLDN12			WNK2	TANC1
PRRG4			AKR1C13	PPFIBP2
TBCA			TMSB15B1	AKP3
MYDGF			DMBT1	CD97
NAB1			SFRP5	RPL15-PS2
TTYH3			ATP5L	FAM188A
GPRC5C			1810020D17RIK	BCAR1
MICALL2			NLRC3	TSPYL2
RAB27B			SLC41A2	B4GALT1
SULF2			TMSB15B2	RASGRF2
CDH3			TMEM45B	BAZ1A
FAM89B			NEURL2	PAK2
MUC12			HCN3	2700007P21RIK
RAB22A			ABAT	B230312A22RIK
TMEM92			BTNL3	JUND
TCIRG1			MREG	PRKCE
KDELR2			ADCK3	TES
TOMM20			2010106E10RIK	FHIT
TFPI			RNASE4	SPR-PS1
PTPRF			GM11062	FAM82A1
ZFP36			GM7030	RNH1
YPEL3			SLC46A3	ZFP189
RASSF7			BCHE	H6PD
TMC6			ACY1	GM11175
CFDP1			CCR9	CLTB
MT1M			ACOT1	RABGEF1
ITGB8			DEFA3	FAM116B
NAP1L1			PDE2A	PRR13
FAAP20			ADRBK2	SNAP47
SH2D3A			FGF1	LIMK1
DDIT3			CASP6	SLC39A13
ARL6IP5			EFNA4	PTPRJ
TMEM256			MERTK	ABI3
TSC22D3			ALDH1B1	FGFR3
PITPNM1			SOX4	DBNDD2
ATOX1			LRIG3	4930500M09RIK
C1GALT1			SLC16A10	MTAP1S
XIST			APOC2	HPCAL1
IER5			COMP	IMPACT
ADAM10			NTS	RHBDD1
DDX3X			KLHL24	DBNDD2
TGFA			SBK1	LONRF3
CHCHD2			VDR	CLIP1
SLCO4A1			RASSF5	GM347
NUP50			RIMBP2	CHST11
HELLS			ANG4	MESDC1
RALGDS			KLK1	ZFP932
CCNL1			9130204L05RIK	P2RY6
MYADM			CYP2B13	GPR30
LAMA5			CD36	CD59A
ITGA6			GM1123	RASGRP4
ENTPD2			PM20D1	CASP1
ATF4			BAMBI	NMRAL1
NPC2			SPINK4	PYGL
POLR2A			GPT	DECR1
ADGRG6			FAM151A	CDX1
KCNK6			CPLX2	FZD9
PTGES			KCNK16	ATP6V0E2
PPDPF			APOC3	ZFP629
CHAC1			CCL6	1700066B19RIK
NFE2L1			CYP2B9	RPS28
SAMD9			SIDT1	EPHB4
SHARPIN			AQP1	TMEM163
ANKRD37			ASAH2	GM10768
SSNA1			LRAT	CBX7
ADGRF1			SLC39A5	ATP8A1
SLC25A23			NOXA1	DNM1
NAMPT			PALM	GM5113
MRPS21			SLC2A9	KLHL17
CTBP1			OAT	GM11048
TIPARP			AGMO	HCK
STAT6			LCP1	SDSL
SH3GLB2			SLC14A1	FABP5
RGCC			APOA4	GM14850
DTX2			PSMB8	GM15293
EFNA1			GLTPD2	TIAM1
EIF4G1			IL17RD	FSD1L
BCL9L			VWA5B2	GRB7
PTBP1			LFNG	NIT2
PDLIM1			GM609	SPIB
BMP2			SEMA7A	CYP2J6
CSNK1A1			DPEP1	TOX3
TRABD			SLC28A3	ABHD14A
NFKB2			CYP2D22	TRIM2
PKN2			GCG	BHLHA15
CLIP1			MGST1	NAPEPLD
COX7A2			TTYH3	FAS
CDC42EP2			LMCD1	TFRC
MAPK3			PAPSS2	NLRC4
PARD6B			DAK	GM9994
SOCS6			FBLN1	INPP5J
VILL			SLC6A4	FGFRL1
MBOAT7			TAC1	UROD
LY6G6C			CD200	MTX3
CDH17			CES2F	TBC1D14
PQLC1			ESAM	GM10967
CTD-3252C9.4			MPP3	ZFAND1
DPP7			SELM	LRRC26
MICAL2			PTPRN2	SLC25A36
SPON2			GNG11	STX17
ACBD3			KCNJ2	RCCD1
SHMT2			LRRC19	SNX20
FAM50A			AGMAT	CYP2C44
EIF3J			1810030J14RIK	MMP7
KLF4			TEAD2	TMEM89
ARHGAP21			SCIN	AY761184
ANAPC11			FZD4	TYMP
NACA			NAALADL1	APLP1
C16orf74			CBS	GIMAP1
YPEL5			MICAL1	FAHD2A
UBE2D2			SLC5A8	CYP2C66
RP11-54H7.4			NCALD	THA1
LTBR			NR2E3	CASP3
GSKIP			TEX12	CDCA7L
RNF103			GM12258	MS4A10
SRRM2			BCAS1	TNFRSF11A
NDUFA7			CSAD	LPGAT1
H3F3B			GSTM7	UPB1
CALR			MAOB	AK4
KIAA1551			HPN	SCG2
OASL			CARD11	CHGB
TJP3			HSD11B2	BTG2
NEDD8			PTPRO	BRP44
CD151			DBP	GGT7
RPN1			SECTM1B	2900097C17RIK
WIPF2			SLC4A5	LGALS2
SEZ6L2			SORCS2	ZKSCAN14
ZFAND2A			OCIAD2	PNKD
COMTD1			GSTM4	MSRA
VPS4B			GM11437	OCM
SNHG8			MT-ATP6	ITGAM
PELI1			SLC7A8	DCXR
C19orf66			MOGAT2	ALG6
UBQLN1			2410017I17RIK	ATF7IP
HLA-E			ADCY8	PPT1
BRD4			GALNT5	INSIG1
NAPG			RAP1GAP	PCMTD2
FAM177A1			DPYD	CCDC28A
RBM47			RASA4	SLC35A3
MTAP			TRPA1	NUDT12
NDUFV2			PIPOX	ACRBP
PLEKHB2			PCDH19	SLX1B
CKS1B			CD177	PHLPP2
MAP7D1			UCN3	ERO1LB
PFDN2			SEMA4C	DPPA5B
CEBPD			FAM117A	TCF7
TFDP1			PLA2G4A	ULK1
RSAD2			FAAH	CYP2C65
PRELID3B			FABP2	MAST3
GNA11			CCL25	TMEM42
PPIC			GAMT	GOLT1A
DUT			FEV	FUT8
DPY19L1			MT1	IL11RA1
PIEZO1			RETNLB	ALDH18A1
TMEM165			NAV2	IFI30
FOXQ1			TCEA3	ACAD12
NDUFA11			GM52	CEBPA
EID1			SLC2A2	REEP6
SMS			DUOXA2	JAKMIP1
ITGAV			BMP3	CDC73
CEBPB			AKR1C19	ZBTB38
RHOA			HES2	SLC7A9
LRRC1			SLC6A20A	STMN1
DDT			CYP2C39	BCL2
GADD45B			PBLD2	CLYBL
PLLP			NDUFA4L2	ZFP873
CAPZB			HEPACAM2	DEPTOR
MIEN1			RBP2	GDE1
NTMT1			ADH6A	ATP10B
TCTEX1D2			SLC22A1	NRGN
ANTXR2			TTC36	PRPS2
RABIF			MRO	FUCA1
PRDX6			SLC27A6	EPHB2
SUMO3			SYCE3	GRAMD1C
BAG1			VIM	ALCAM
MIA			MCOLN2	TNFRSF19
UFD1L			RASSF4	1110021L09RIK
POLE4			SLC43A2	ST3GAL1
DPYSL2			FAM46C	ARMCX1
JOSD2			HEMGN	TPPP
ATG12			TOX	FOXO4
NUDT8			GM10109	RNF43
MRPS16			LCT	BC066135
MFSD10			MEP1A	GM9780
DSTN			GM10684	GM10395
PRMT2			MSI1	GM2104
AHCYL2			ZG16	GLA
SFXN3			FMO1	GSTA1
SLC38A2			PRSS30	WBP1
ZBTB43			1300002K09RIK	SLC30A1
PDGFA			CES2E	RPA3
EHD4			ATP2C2	NR1D2
NDUFA13			TFPI2	TRPM5
SZRD1			SP5	AI467606
MCU			DLL4	ENTPD8
FOSB			SCGN	UPP1
LGR4			5330417C22RIK	TXNDC5
FIS1			USP2	D130043K22RIK
EIF4G2			GM10925	ALDH3A2
CTD-2147F2.1			COX7A1	CCBL1
HDGF			ADH4	MDM1
IFI27L1			2810408A11RIK	4831426I19RIK
ARPC5			DIO1	DHRS11
HINT1			AMICA1	TEC
DDAH2			SLIT2	GOLM1
ARHGDIA			REP15	NEIL3
AUP1			SLC7A15	9130230L23RIK
TRIM16			KCTD14	FCHSD2
LITAF			KBTBD11	USP49
SLC5A3			AMIGO2	VTI1B
GTF3C6			BACE2	DEFA20
RRBP1			SLC5A1	GM14410
PODXL			KHK	AMPD3
ALDH3B1			SLC12A8	SLC7A4
SSR3			ALDOB	CENPP
FXYD3			2010001E11RIK	XKR9
TRAF4			SORD	CUEDC1
COX7C			CYP4F15	RCBTB1
PML			ABCB9	BAIAP2L2
RAB1B			SLC13A2	WIPI1
RNF126			CYP2C67	LRRC56
GFER			SLC6A19	NR3C2
PTPMT1			CES1C	GM239
C11orf24			GPR133	CCNJL
SEPT10			4930430O22RIK	ARSB
RTN3			FFAR2	BCL11B
RP11-295G20.2			DHRS3	SLC16A13
FGD6			YPEL2	GATSL2
SAMD1			ACSM5	AMBP
ZNF185			TERT	GPAM
RHBDF1			GM14295	MORN2
SLC25A39			CAR8	TCF4
ICMT			NR0B2	TRAK1
DPH3			NEU3	BCL7A
LCOR			SLC10A5	UQCRH
UQCR10			PIGR	LCLAT1
ALS2CL			ST3GAL4	UQCR11
SLC25A25			FCGBP	D14ERTD449E
GULP1			CCDC3	MAP4K2
RALB			CD302	IDH1
CDC25B			PDCD4	TTC23
OSTF1			GSTM6	SIGLEC5
RP11-532F12.5			SIS	BCL2L15
SHFM1			MUC2	SCD1
ATP13A2			ABCA1	DHRS1
AK1			9530053A07RIK	BPGM
VWA1			GM10935	TBC1D4
NFKBIZ			CRP	FAM183B
KIAA2013			TMEM86A	DGAT1
CORO2A			PTHLH	CHRM3
BTBD6			AGR2	CBX8
TMEM8A			EFCAB4B	STAP2
TMED3			CYP3A59	RGS13
LPIN2			OTOP3	YIPF1
FAM84B			LTB4R2	NETO2
F12			PROZ	PCP2
PLXNA3			R3HDML	ABCC2
ELOC			RAC2	BET1
TMEM30A			CML1	PDE3A
KLHL42			LTB4R1	FAM98C
LIMA1			UGT2B36	RABGAP1L
TXNIP			ABCC6	HIST2H2BE
COBL			ERN2	SYDE2
VAT1			EPB4.2	SESN3
COX6B1			SLC47A1	CYP2J9
EPB41L4A-AS1			GPR155	1500035N22RIK
TK1			SLC16A12	AGT
UBXN1			ADH1	CEP68
LMO4			MCF2L	SCRN2
CTNNB1			CYP3A11	RAD54B
NET1			PNLIPRP1	MATN2
GPD2			PROS1	GM7861
CENPB			ENPP7	COX7A2
PYGL			BCO2	ATP7B
MESDC1			RHBG	RNF167
POP7			IYD	FERMT1
ACADVL			ATOH1	ERN1
KPNA4			CYP2C68	ARHGEF26
NPNT			SLC30A10	TOMM40L
XIAP			AKR1C21	TMEM97
PPP1R18			CREB3L4	FBXL20
SYNGR2			PRRX1	POLG2
WWC1			CREB3L1	GRK5
PRR13			LGR5	PHLDB1
HIGD1A			RASL12	C8G
KRT23			CYP2E1	DHCR7
ADIPOR2			AQP4	FBXO48
RCAN1			CES2B	ANXA13
MSI2			SCN2B	2610021A01RIK
TNS4			D630039A03RIK	GLCCI1
PTK6			AKR1C20	SH3BGRL
ANKRD11			GPR157	SLC12A7
CDKN1C			SLC26A3	GPLD1
TRIB3			SPDEF	SCAMP1
PON3			SLCO2B1	UBE2CBP
CXCL3			WNT3	PRSS41
FNDC3B			N4BP2L1	DGAT2
PCBD1			IDO1	HIST1H2BC
SCEL			CES2A	CPHX
FKBP8			SPINK3	COX7B
HAGHL			MOSC1	1110001J03RIK
UBE2A			VWA2	HEATR7B1
RP11-465N4.4			TNFSF10	KLHDC9
MPPE1			LIPN	DAB1
DHFR			ODF3B	CD38
CBX3			ID4	GM10311
ABHD3			SLC2A7	A930001N09RIK
FRMD4B			UGT2B38	PIK3R1
SLC9A1			CYP2C69	OSGEPL1
PALLD			ABP1	KDSR
OAS2			ACAA1B	MANSC1
BAD			SLC25A45	MATK
PNMA1			FER1L6	GM10639
TNFSF9			GSTM3	GCDH
CHMP1B			GM6020	SH2D7
ODF3B			KIT	GM10108
CDC42BPA			OSTB	BARX2
C6orf48			GM11078	ATP6AP2
TRIB1			MME	MLEC
C12orf49			CAPN9	GM3776
CERS2			GSTM1	EHF
TRIM7			1190002H23RIK	SLC22A4
CCNL2			SLC2A10	ZFP759
PTMS			PBLD1	ACSL1
APOL2			MFSD7A	IL17RB
CTNNBIP1			GSTM2-PS1	1110034G24RIK
ATG101			TPSG1	CFTR
LAMTOR5			HPGDS	FAM115C
GATAD2A			REG1	PSMB10
NAA50			ECI3	MPZL1
TWF1			PLA2G5	WEE1
SFR1			TRIM38	ZFP125
PPP2R4			REC8	SEMA4G
OSBPL1A			GUCA1A	NPC1L1
C20orf24			RDH7	BTN3A3
FIBCD1			CYP2C38	SLC27A4
NRP2			NOX1	ANO9
ZBTB7A			UGT2B5	D4WSU53E
BCL7C			RGN	MYL6B
DUSP6			GM17269	BPNT1
PINK1			CST6	MS4A8A
RBBP8			NEUROG3	1810046J19RIK
PDE4C			GGT1	PLEKHF1
TNFRSF14			RASD2	PGBD1
SLC39A14			FABP6	GMDS
CSNK2B			CES1G	BCL11A
JUNB			AKR1C6	MTERFD3
MTUS1			UPK3B	ALOX5
TRIM25			DUOX2	GUCA2A
MINK1			ARG2	APCDD1
SCD			CES1E	CMC1
VIM			ANO7	ZFP950
UBE2I			4933402N03RIK	METTL7A1
SF1			SLC37A2	TMEM19
LPP			GM684	PEX1
REEP5			AKR1B7	HDDC2
PAPOLA			CYP2C40	NME3
SIGIRR			SERPINA1B	PREPL
SDCBP			UGT2B37	LPIN1
HGS			SLC30A2	GM1840
KDELR1			VWA1	VPS13D
ST3GAL1			ADH6B	MAN1A
TMEM127			SARDH	1700029I15RIK
BUD31			RAMP1	AQP3
IFI35			SLC2A5	UXT
LYPD3			SLC13A1	PCSK1
TRIM47			CD244	ABCB1A
JAK1			DNASE1	SLC16A6
ARHGAP32			TREH	SDHD
ACOT9			SPP2	SHMT1
DNAJB6			ADH6-PS1	SLC25A44
RAB6A			AQP8	FADS2
PPP1R15B			4933417A18RIK	FAM123B
ATP5L			GM9992	ABHD14B
C19orf60			CES1B	ZFP101
SMAD2			SLC5A4A	ZFP273
FAM136A			VWCE	TNFAIP8L1
RP11-395B7.4			RBP7	TMEM20
SAR1A			1810046K07RIK	DEFA22
MIR210HG			TTC39C	GSTT3
SEM1			PRELP	PKIG
PAFAH1B2			APOA2	SLC9A5
MAD1L1			FBP1	GM7889
GADD45GIP1			PLA2G10	CXXC5
MBNL2			TSGA10IP	TIPARP
TNFAIP1			MT2	OIT1
HELZ2			GM17367	RXRA
BTG3			SLC5A4B	NDST1
MYBL2			CYP2U1	BCKDHA
SERTAD2			KY	ABL1
MORF4L1			PCDH8	MRPL34
TMEM120B			EDN2	PRKAG2
CCDC6			CTRB1	D2HGDH
IFRD1			TTR	SYCP3
EIF3B			CYP2D26	ZFP768
TMED10			LEAP2	CTSA
TGFB1			SLC5A11	ENTPD7
ABHD11-AS1			RIMS4	AMACR
ENC1			PCP4L1	PSME2B-PS
VTI1B			MT4	PTER
MAPK1IP1L			CCL9	5031425E22RIK
VOPP1			SLC6A3	GCAT
HHLA2			SIGLEC15	IFITM2
RBMS2			FABP1	LPAR5
C12orf36			CES1F	GLB1L
NCLN			PAQR9	CEP78
ZNF664			AGR3	TTC39A
DOK4			HSD17B6	ASPH
MESP1			SLC28A1	KLHL8
RNASEH2C			BBOX1	H2-Q10
FKBP9			HMGCS2	PTPLAD1
ACTR2			AKR1C14	DYRK1B
ERBB2			CYP3A25	ATP1B1
PPP4R1			GKN3	BC017158
TOR1AIP2			CES1D	AHCY
ELF3			CAR4	FRYL
CSRP1			OLFM4	PTGR1
MDM2			G6PC	NNT
ATP2B4			REG3A	B2M
KPNB1			CD83	PGAM2
PPP1R11			CES1H	BRCA2
RTN4			C87977	SOAT1
ATF3
GK
ACAP2
TTC9
UACA
SMG7
CAPN5
ETHE1
AMIGO2
CD58
TMEM164
NDUFB1
MTMR11
TMEM63B
HNRNPDL
MTPN
H1FX
PFKFB3
HSBP1
OGDH
SIRT7
ABHD17A
B3GNT3
SYTL1
PDCD5
MAP3K11
IBTK
ECI1
GNAQ
XPO1
NXPH4
RWDD1
TM4SF5
MRPL33
USF2
ARHGAP29
ARRDC4
SRA1
PKDCC
SEC31A
RAB5B
RALGPS2
NDUFC1
TUSC2
CDC42SE1
CA9
RUNX1
LMF2
HP1BP3
ZNFX1
GANAB
YY1
ARL8B
RUSC1
POLR2F
ARGLU1
BIRC2
SLC40A1
CCDC91
GRINA
CCNG2
TRAF7
CDC37
PHC2
CTBP2
CNIH1
WDR13
SMIM6
CLTC
ANKRD36C
PPP1R16A
TLE1
LSM12
ASAH1
NDUFA12
ITGB6
DEK
RAC2
IER3IP1
SERTAD1
TMEM18
SLC7A1
IFT172
SSSCA1
PDCD6IP
CYP4F3
PAFAH1B1
NAP1L4
TESC
SBNO2
NT5C2
CLIC4
NPLOC4
B4GALNT3
EIF3H
SNX8
ZNF593
DNAJB1
DAG1
DLG3
CUX1
SH3RF1
RTF1
CYFIP1
LSM2
APOPT1
VAMP3
ATHL1
SLC25A24
PHF19
SP100
PPM1G
MAPK1
SLC37A1
PABPN1
BTF3
PPFIA1
ARF3
TP53I11
TOLLIP
C19orf10
ARHGEF12
LSM1
IAH1
TMEM248
RHBDD2
ANP32B
SRRM1
HEBP1
DAZAP2
ATP6V1E1
VMP1
GNG12
CACNA2D4
RBM17
MEA1
FUT3
SPTY2D1
DPM2
PGK1
ATN1
TMED7
MAZ
C11orf83
SSBP4
SHC1
SGPL1
RAD23B
ERCC1
DAD1
SHISA5
PARP12
SEC14L1
UBE2J1
SF3B6
BCL7B
CSRNP1
UBE2L3
ARL5B
RMND5A
PSMB7
SAP30BP
TJP2
U47924.27
SERPINB9
ABTB1
NCKAP1
NT5DC2
RNF181
OSBPL8
SMUG1
EMD
MAP4
XAF1
HOOK3
DUSP3
UBE2F
PITPNA
CAMTA1
IPO7
KLF16
BMP7
DUS1L
RAB11B
LINC01420
STX7
CTXN1
TBC1D1
VNN1
SEC16A
TSC22D4
PVRL2
COX8A
ING2
NAXE
CARM1
DLST
GPBP1
YOD1
C16orf13
LARP1
GDPD3
DBNL
C19orf24
MRPL57
IST1
SLC1A5
SYAP1
P4HA2
C17orf89
BID
TMEM41B
GABRE
C3
KLF13
PARP9
TMED4
DNAJC9
BLOC1S2
DENND3
FRMD8
SBDS
CCM2
RAB14
ARHGEF2
COX20
MORC4
AC069513.3
SP1
KLHL21
IGLC3
TAP1
CRK
ZDHHC5
RANBP9
TRIM28
LSM4
LRFN4
NEK7
PPFIBP1
SLC44A2
SREBF1
PQLC3
CISD2
GADD45A
TSR3
DYNLRB1
CXADR
SMURF1
DNAJC5
SHOC2
C9orf3
RNF220
PTMA
SLC3A2
NPSR1
DLG1
LETM2
PDS5A
AFF4
HIST1H2AC
TOB2
NT5C
AAK1
RP11-467L13.7
ZFAND2B
TRIM8
TSPAN14
EMC7
CDHR5
LRCH1
NDUFB7
PPP1CA
CALB2
RP11-382A18.1
KATNBL1
EIF4E2
MGEA5
RELA
TBL1X
MSANTD3
PYGB
RAB21
SLC4A2
SPTLC2
HIF1A
FAM63B
MOB1A
RAPGEFL1
UBA6
FAM49B
SORL1
PNRC1
CYSRT1
CHURC1
SLC25A29
TUBA1B
SFXN1
LRRC42
BCAP29
STK17A
TNKS1BP1
INTS1
G3BP2
CHCHD10
NR2F2
DNMT1
HYOU1
CLTA
POLR2H
EGFR
RCC2
GUCD1
MROH1
SCNN1A
ANKRD9
PDZD8
EPPK1
ECT2
MVP
UBE3C
SLC35D2
SPG21
KLC1
MT1G
FAM120A
OSBPL3
PSMG4
ZDHHC20

## Sheet: Other stromal signatures
Buechler_NF	Pelka_CXCL14+_CAF	Pelka_GREM1+_CAF	Pelka_MMP3+_CAF	Pelka_myofibroblasts	Chen_matCAF	Chen_iCAF	Smillie_IAF
C7	CXCL14	COL1A1	FTH1	TAGLN	COL10A1	CCL2	PLAU
CFD	RARRES2	COL3A1	MT2A	MYLK	CTHRC1	CXCL12	CHI3L1
PRSS1	IGFBP7	COL1A2	SOD2	MYH11	POSTN	CXCL14	MMP3
GSN	VCAN	CTHRC1	GAPDH	TPM2			IL1R1
ADH1B	PDPN	COL5A2	FTL	ACTG2			IL13RA2
CLPS	CTSK	BGN	CXCL8	TPM1			TNFSF11
APOD	F3	LUM	CEBPB	ACTA2			MMP10
PRSS2	CXCL14	THBS2	TPI1	MYL9			OSMR
PNLIP	PALLD	COL12A1	MT1E	DSTN			IL11
CCL2	COL3A1	COL6A3	IER3	MYL6			STRA6
IGFBP5	COL1A1	POSTN	ENO1	LPP			FAP
COLEC11	CTSC	INHBA	PKM	CNN1			WNT2
A2M	TMEM176A	ANTXR1	CD44	FLNA			TWIST1
CELA3B	TMEM176B	SPON2	NAMPT	RP3-412A9.11			IL24
MGP	EMILIN1	AEBP1	COL7A1	SYNPO2
CTRB2	LUM	COL5A1	TGFBI	DES
SEPP1	COL1A2	PDPN	LDHA	CALD1
CPB1	COL5A1	FTH1	MMP1	PDLIM3
CPA1	INHBA	SULF1	SAT1	CSRP1
RPS4Y1	FHL2	MXRA5	RP3-412A9.11	ACTB
FMO2	AGT	FAP	WNT5A	PLN
DPT	COL12A1	MMP14	PHLDA1	LMOD1
AMY2A	SPON2	RARRES2	SLC16A3	LTBP1
ABCA8	TIMP1	RAB31	MMP3	ACTN1
CELA2A	F2R	DCN	INHBA	NDUFA4
APOE	COL6A3	MMP2	CXCL1	SLMAP
COL15A1	PDGFRA	LGALS1	SEC61G	PALLD
CELA3A	NBL1	PRRX1	TMEM158	PDLIM7
SMOC2	F2R	GREM1	CD82	MIR143HG
CST2	SERPINF1	TPM2	LGALS1	HSD17B6
SOD3	C1S	COL6A1	MT1X	FHL1
HSPB6	C1R	CTSB	LOXL2	NEXN
PLA2G1B	CDH11	FN1	BNIP3	SMTN
GPX3	TPM2	CTSK	F3	PPP1R12B
FBLN5	EMID1	RP3-412A9.11	TMEM132A	WFDC1
MYC	BMP4	MFAP2	MIF	FILIP1L
SCN7A	MMP11	SOD2	TIMP1	KCNMB1
SYCN	PCOLCE	CALU	CHI3L1	TGFB1I1
SOCS3	MFAP2	CDH11	COL3A1	COL3A1
SPTBN1	COL6A1	TNC	TNC	TIMP2
TFPI	COL5A2	VCAN	TNFRSF12A	HHIP
IGFBP6	WNT5A	PCOLCE	COL12A1	C1S
RARRES1	PCDH18	COL11A1	PGK1	CKB
RBP1	LGALS1	ADAMTS2	ANGPTL4	KANK2
CTRC	EFEMP2	TIMP2	PLOD2	EMILIN1
SERPINE2	SULF1	PLOD2	GLRX	NBL1
EFEMP1	TGM2	EMILIN1	ADM	CRYAB
PDK4	PALLD	TNFAIP6	FAM20C	MT-RNR1
CTRB1	DKK3	STEAP1	BNIP3L	RGS2
NDRG2	FENDRR	ADAM12	PDPN	LGALS1
SPARCL1	AGT	THY1	DCN	TUBA1A
NFIA	LGALS3BP	COL7A1	RPL28	MT-ATP6
LTBP4	MMP11	TWIST1	GSTO1	MSRB3
ALDH1A1	DCN	TNFRSF12A	LUM	SORBS1
HTRA3	THY1	BASP1	VEGFA	NPNT
NFIB	ALDH1A3	FTL	COL1A1	SOSTDC1
PTGDS	PTCH1	COL10A1	CXCL5	TCEAL4
CEBPD	CISD1	TGFBI	TMEM45A	MT-RNR2
ENG	CALD1	RCN3	TPM2	SH3BGRL
C3	PPIB	WNT5A	ERRFI1	CES1
CD34	RBP1	COL6A2	PLIN2	ITM2C
HSD11B1	PROCR	NBL1	SPON2	PCDH7
ADAMTSL3	NSG1	MXRA8	IL24	MFAP4
CD302	CISD1	WISP1	COL5A2	ILK
IGFBP2	CTSC	TMEM158	PRRX1	SVIL
IGF2	PTMA	CLMP	ACSL4	LUM
LAMA2	TMEM98	SLC16A3	MME	PPP1R14A
PLPP3	PAG1	BICC1	ANXA5	PRUNE2
ABCA6	MDK	PODNL1	SLC39A14	PLEKHO1
GALNT16	MEST	C1S	HILPDA	NUPR1
PLXDC1	MEST	TPM1	PLAUR	ITGB1
IL6ST	SPATS2L	PALLD	CA12	VCL
SVEP1	FHL2	STEAP2	RUNX1	MYOCD
ADAMTS1	SDC2	PKM	IL11	CCDC107
FHL2	TMEM158	CEBPB	P4HB	MT-CO3
ABCA9	MEG3	ISLR	AKR1B1	MRVI1
EMP1	FOXF1	SPHK1	STC1	EDIL3
CYGB	CLEC11A	CHPF	G0S2	SGCA
IGFBP7	FILIP1L	SERPINH1	MMP14	C1R
REG1A	MXRA5	CALD1	CXCL3	MT-ND3
LITAF	PDPN	FKBP10	PGAM1	FBXO32
CXCL12	TMSB10	P4HB	NNMT	FERMT2
FXYD1	ST5	MMP1	RND3	TES
GPC3	PPP1R14A	NTM	NBL1	RBPMS
NEGR1	MXRA8	MRC2	OAZ1	FN1
CLEC14A	INHBA	GAS1	TNFAIP3	TNC
PLTP	MDK	CERCAM	RPLP0	C9orf3
SPINK1	C2	SPOCK1	HIF1A	COL1A2
CRISPLD2	MMP2	RUNX1	CTSB	ALDH1B1
SRPX	AEBP1	SPARC	TNFAIP6	TLN1
KCNN3	PITX1	DDR2	COL6A3	IGFBP5
FXYD6	RARRES3	PTK7	PDLIM4	CFL2
ADIRF	TSPAN33	ARF4	TNIP1	AKAP12
COL4A1	TPM2	COL8A1	RCN3	AOC3
QSOX1	TGFBI	CLEC11A	GK	DDR2
LIFR	ISLR	FAM20C	S100A6	COL1A1
SPRY1	ANTXR1	FSTL1	NINJ1	ANTXR1
TNXB	RUNX1	MT1E	COL6A1	MRGPRF
RGS5	PDGFC	OSTC	AXL	SAMD11
TRIL	EMID1	CD82	VMP1	RAMP1
SGCE	EDIL3	CTHRC1	MT2A	TAGLN
ITIH5	PAG1	COL1A1	GAPDH	MYH11
PDLIM1	PPP1R14A	BGN	FTH1	MYL9
FRZB	IGFBP7	COL3A1	SOD2	ACTA2
AKAP12	SOX4	COL5A2	CXCL8	MYLK
ABCA10	SEPT11	COL1A2	TPI1	DSTN
PDGFRA	FBLN1	FAP	NAMPT	ACTG2
PID1	PLAT	RAB31	MT1E	TPM2
PLBD1	F3	INHBA	ENO1	MYL6
HEYL	GPC1	POSTN	IER3	TPM1
SLC2A3	MARCKSL1	COL12A1	PTMA	CNN1
IGFBP3	CH25H	THBS2	LDHA	FLNA
APLP2	WARS	SPARC	PKM	LPP
ANGPTL1	CNN2	SULF1	SAT1	ACTB
MYOC	VCAN	PRRX1	SLC16A3	SYNPO2
LSP1	COL6A2	COL11A1	CD44	DES
EDNRB	PLOD2	SPHK1	STC1	PLN
PODN	TGM2	TPM4	MT1X	CSRP1
TCF21	PLAU	ADAM12	COL7A1	PDLIM3
CFH	RGS10	ANTXR1	SEC61G	LMOD1
AMY2B	ITM2C	LGALS1	MMP1	ACTN1
OAF	SOX4	TNC	MIF	RP3-412A9.11
MATN2	CARD16	COL10A1	BNIP3	SLMAP
PROS1	MYL12A	SLC16A3	PGK1	LTBP1
TSHZ2	LSAMP	IL32	MMP3	PPP1R12B
NTRK2	BICC1	MMP14	TMEM132A	NDUFA4
CRIP1	FARP1	TPM2	CEBPB	MIR143HG
IL33	TCF4	SERPINH1	RAB13	KCNMB1
MGLL	CFL1	CTSB	PHLDA1	CALD1
COL14A1	PDLIM1	GAPDH	GSTO1	SEPW1
PRSS3	SPATS2L	GREM1	LOXL2	PDLIM7
CIRBP	DKK3	ADAMTS2	CD82	HSD17B6
EPAS1	ALDH1A3	COL7A1	FTL	SMTN
SELENBP1	NSG1	TWIST1	HIF1A	NPNT
ACVRL1	SERPINH1	TNFRSF12A	CXCL1	RGS5
NID1	COL12A1	SOD2	IL32	TGFB1I1
COL4A2	RBP1	HIF1A	ITGA5	SH3BGRL
THBS4	CH25H	FTH1	ANGPTL4	MSRB3
MFAP4	C9orf16	CALU	CHI3L1	HHIP
PIM1	SULF1	LMCD1	GLRX	WFDC1
CPXM2	MYH9	WISP1	DDIT4	SORBS1
LAMB1	TSPAN33	PDPN	TNIP1	CKB
MFGE8	RARRES2	TMSB10	WNT5A	CSRP2
VLDLR	RCN2	TNFAIP6	IL24	HSPB1
ARHGDIB	MFAP2	MYH9	CYTOR	ACTN4
SCPEP1	PCDH18	FN1	TMEM158	ITGB1
FMO3	C4orf48	MMP1	INHBA	PLEKHO1
NR1H3	NDUFA4	PODNL1	CXCL5	TCEAL4
FBLN1	PTCH1	RAI14	RPL28	SOSTDC1
ADD3	POMP	STEAP1	TGFBI	COL4A2
C2orf40	WNT5A	COL5A1	CXCL3	NEXN
ZFP36L2	CNN2	PLOD2	TNC	MT-RNR1
SAMHD1	LGALS1	MXRA5	IL11	PRUNE2
F2R	ZEB1	ACTN1	BNIP3L	SVIL
EPHX1	CDH11	MFAP2	HILPDA	KANK2
LINC01140	CALD1	NTM	PLIN2	CRYAB
ITM2B	MYLK	SULF2	ACSL4	MYOCD
CTSC	PSMB9	ITGB1	LRRFIP1	MT-ATP6
KCTD12	C9orf3	MT1E	SLC39A14	TES
SRGN	WNT4	PKM	TNFRSF12A	PPP1R14A
RNASE4	COL5A1	COL6A3	AP2S1	PALLD
GSTM5	CYTOR	TAGLN	POMP	ILK
IGF1	SULF2	NRP2	SERPINE1	PTMS
C11orf96	MRVI1	RP3-412A9.11	NDRG1	MT-RNR2
NGFR	WNT2	BMP1	PGAM1	VCL
MAP1B	CAV2	SLC39A14	TNFAIP3	PAWR
FHL1	FBLIM1	PTMA	UPP1	CCDC107
SMARCA2	PDGFC	SPOCK1	PLAUR	C9orf3
PTN	CHCHD10	P4HB	MME	PPP1R12A
CELA2B	ITGA1	RP11-400N13.3	RP3-412A9.11	AOC3
PREX2	GPC1	EVA1A	NINJ1	RBPMS
SYNPO2	SPARC	LTBP1	CAV1	CFL2
PCYOX1	HSPE1	PRELID1	FADS3	TUBA1A
GP2	BMP4	SSR3	ERO1A	TPM4
CHRDL1	TAGLN	ARL4C	ADM	FHL1
CD38	TPM4	AEBP1	VDAC1	SGCA
CEL	ATP2B1	MARCKS	GK	MT-CO3
CPA2	TMEM158	ITGAV	MT1F	FILIP1L
ZFP36	PSME2	CLIC4	HMGA1	MRVI1
NDUFA4L2	CALM1	LOXL2	PLOD2	WDR1
MTUS1	ID3	STEAP2	RPS19	TLN1
LAMC1	PLAU	ADAMTS12	COX7A2	CLIC4
G0S2	FENDRR	RAB13	PHLDA2	CAV1
GNG2	LIMS1	KDELR2	COTL1	RGS2
ITM2C	SERTAD4-AS1	TMEM158	OAZ1	SPARCL1
NR2F1	RPS19	GUCY1A3	KLHL5	FERMT2
STEAP4	PMEPA1	CHPF	C4orf3	LIMS2
KAZALD1	CALR	GAS1	VEGFA	PTMA
MGST1	ETS2	MICAL2	S100A11	ALDH1B1
ALDH1A3	LEF1	GJB2	WTAP	MT-CYB
CFI	ISG15	OSTC	PTGS1	FBXO32
SLIT2	ADAM19	PTK7	PDLIM4	GBP2
MBP	F2RL2	PDGFRB	PFKFB3	CD9
RASL11A	FARP1	COTL1	CA12	KCNMA1
RPLP0	ST5	IER3	FAM20C	SYNM
SLC40A1	TGFB1	PLPP4	IL6	DMD
LRAT	DLL1	BCAT1	ERRFI1	PFN1
PLD5	THY1	CCND1	ZC3H12A	MINOS1
PPP1CC	HSPA8	SOX4	G0S2	NRP2
DAAM1	H3F3A	CD82	LGALS1	TNS1
PLOD1
SON
ADAMTS4
PCDH9
SULT1A1
TFPI2
C10orf10
CCDC80
SFRP1
CAPN6
METTL7A
F3
GSTM3
C1orf21
FCGRT
TAC1
DKK3
CHCHD10
NFASC
PBX1
EIF3L
ABI3BP
THBS1
S1PR3
ECHDC2
DDX5
NR3C1
SERINC1
PLAC9
NOV
RGMA
AOC3
DCN
MYADM
EPB41L2
EIF4B
TGFBR2
LXN
KLF10
SCARA5
MT1A
MT1G
IFITM1
ITM2A
S100A13
SLC29A1
ZBTB20
GNG11
PLAGL1
NRP1
CYSTM1
JUNB
NAV1
LHFP
GGT5
PPP1R10
PLSCR1
DDX3Y
BOC
PNISR
TACC1
PRCP
STOM
ADH1C
CST3
ITGA1
SRSF5
GYPC
IL34
WSB1
CCL21
CTSF
PSAP
ABHD14B
PAMR1
CTSL
COLGALT2
ACADVL
DHRS3
EPS8
SERPING1
HLA-E
CTRL
SPOCK1
RSPO3
TRIP10
ANGPTL4
RHOJ
ZEB2
RHOBTB3
EBF1
TNS2
CDC42EP4
PGF
SMDT1
HSPG2
CPVL
RBMS1
SPRY2
RBMS3
GLTSCR2
LTBP2
PLSCR4
EGFR
YBX3
ADGRE5
ANTXR2
CHL1
BCL3
2020-09-04
NFIC
SERINC3
CLMN
2020-03-03
KLK1
RORA
2020-09-07
ART4
SOCS2
ADI1
F10
ARHGAP10
GLG1
RPS7
PTGER4
EPB41L4A-AS1
SRRM2
EEF2
SERPINA3
CDKN1A
NCALD
SNHG7
C12orf57
TMEM204
TAGLN2
LRP1
COL18A1
FEV
CNBP
EEF1B2
CD44
TOMM7
CCNL1
NPDC1
SASH1
DDX17
ST6GALNAC6
HSD17B11
LAMC3
WASF2
CCNI
LMBRD1
GTF2B
CYBRD1
PLPP1
SLC25A3
PRRC2B
CKB
PRDX6
CAMK2N1
RPL36AL
CMKLR1
BDH2
PDE1A
CDO1
CHD9
PDE5A
SPATA6
ENPEP
TMEM59
INMT
RPL3
NOLC1
SEPW1
FAM13C
ADAMTSL2
PTPRS
CBLB
TGFBR3
RBPMS
EEF1D
RND3
KLF9
ZBTB16
RNF146
NPC2
HNMT
ZNF106
DLC1
SEC62
SERPINB1
CLEC3B
CCDC102B
C1R
TMEM173
ADGRF5
INAFM1
ARHGAP29
STAT3
GFRA1
TECR
CYP7B1
SYNE1
CD59
DBNDD2
ADD1
HLA-DRB1
PHLDB1
RBMX
EGFL7
FAM162B
PRKAR1A
ATP1A1
OGN
RPL6
NDUFS2
EIF3F
PTGIR
FOXO3
CITED2
CPED1
NABP1
AC002398.12
PRNP
NCOA7
PHIP
APLNR
MAT2A
TMEM55A
ARL6IP1
SYPL1
HMGCLL1
IRF1
TNRC6B
ZMYM6NB
KIAA1755
AC093609.1
FGL2
EMP2
ABCA1
EPS15
FUS
SPRY4
GMFG
CCNDBP1
FAM13A
SH3D19
FZD4
EIF1B
ADGRA2
TMBIM4
AHNAK
SF1
TGM2
EGFLAM
DUSP6
WBP2
VIPR2
KRCC1
NES
COL21A1
TMEM120A
PCF11
C10orf54
RFK
KIAA0040
NFATC2
2020-09-06
TMEM176A
MAPK10
GBP4
PAG1
PHF3
TAPBPL
ARPC1A
TMBIM6
GNB2L1
EFHD1
TCN2
GAS6
ADAMTS9-AS2
LTBP3
CRYBG3
FAM129A
BNIP3L
TNS1
JUP
FAU
AC007246.3
COL4A4
FSTL3
OLFML1
NFE2L2
GATM
RARRES3
CCPG1
CHN2
AGTR1
CBR1
LIMCH1
SFPQ
SVIL
SNCG
SERPINF1
PCMTD2
CHD1
AKR1C3
UBXN1
CSDE1
DPYSL2
TSPAN3
DDX21
GNA14
PTHLH
ZCCHC24
SCN4B
CRTAP
TPPP3
TXNIP
SGCA
TNFRSF14
FGFR1OP2
DPYD
GCC2
TMEM100
ATRAID
ASPA
HNRNPH1
IRF8
RDH10
C1S
EIF3D
INPP1
NRXN2
BHMT2
PSIP1
DOCK6
LARP6
NR1H2
IL15RA
FOXN3
NR2F2
NTN4
ENPP2
PHYHD1
SLC9A9
TMED4
N4BP2L2
TOR1AIP1
PTPRN2
ANKRD35
ANXA6
LMO3
JAK1
RPL11
RALGDS
SARS
THNSL2
GAMT
CAT
APP
ACSL3
TUSC3
FKBP8
SERTAD3
HNRNPF
NCSTN
SPG20
PCBD1
PCDH18
BCAP29
ADH5
SMAD5
DHRS4
ZRANB2
HNRNPUL1
SF3B2
FRMD3
UNC50
DDX18
MIS18BP1
RPL10A
SMIM14
CPQ
ASH1L
P2RY1
SNAP29
ARHGEF25
JMJD1C
ATP2B1
NPY1R
UGCG
HIC1
AMOTL2
CLSTN2
OTUD6B-AS1
PRDX3
PLD3
PRKAG2-AS1
MAT2B
LRPAP1
ARNTL
PNLIPRP1
CCDC151
ABTB1
PABPC4
ATP1B2
ARAP2
DDOST
TPCN1
LUC7L3
SYF2
MAMDC2
GSTM2
GNAI1
MPHOSPH8
COLEC12
TMEM176B
CYP26B1
RAD21
HNRNPK
PPP1R14A
OGFRL1
RARA
UBR1
AMOTL1
APOL3
RPS5
SDCCAG8
RNF13
SH2D2A
ZNF638
RTN3
NOTCH2
ARHGAP18
ETFB
CD81
AGO2
CREBRF
GLCE
FMO1
SMPDL3A
PA2G4
SCARB2
CSRNP3
MLXIP
RASL12
EPHX2
CALCOCO2
THRA
TPD52L1
MIR497HG
SEPHS2
HAND2-AS1
MYCBP2
MBNL1
COX7A1
LETMD1
CHIC2
PLCXD3
FADS2
IFNGR1
TNNT3
PCNP
TKT
RGL1
CDC42EP2
ITFG1
ARHGEF26
ATP5A1
AAMP
ZNF667-AS1
ECH1
RPL21
RPL4
HLA-DPA1
APPL1
RP11-175K6.1
RPSA
TBC1D5
EIF4A2
NCL
IFITM2
GNPTG
DIMT1
CYB5R3
HAS1
RAB5A
UACA
ORAI3
TMX4
PLIN2
PEBP1
MACF1
HMGN3
ARGLU1
CLDND1
DPP7
IFITM3
GOLGB1
CKS1B
RNF150
AZIN2
BCHE
PLEKHH2
SDHA
ARHGAP15
JADE1
VPS51
VIT
NCOR1
TCEB1
HAX1
FILIP1
ACP5
MIR99AHG
NUCKS1
RND1
PHF1
SNHG9
EIF2A
EFCAB14
CALCOCO1
SAFB2
EID1
VLDLR-AS1
TMEM91
RBBP6
INTS6
AKIRIN2
TPR
UQCRC2
HTR2B
C1orf54
HIPK3
RNF11
RBM17
CD40
C16orf45
XRCC6
PLXDC2
CILP
MAPK3
NPEPPS
POLD4
PHLDB3
SLC8A1
CYHR1
FAM162A
SRSF11
KMT2E
MAOB
SNHG8
AKR1B1
MATR3.1
VWA1
HSD17B12
CCND3
TMEM205
PROCR
ESD
THUMPD3-AS1
GOLIM4
AP2A1
EMILIN1
OCIAD1
SDHD
LMAN2
SRSF1
DAPK2
AES
SKP1
PCGF2
STAT6
PAIP2
RNH1
U2SURP
PEAR1
SECISBP2L
WNT11
TRIM56
AHI1
FOXS1
ABI2
2020-03-02
KCNS3
ETV5
TNFSF12
ZFAND1
KLF4
OSMR
RSL24D1
HGF
STX12
RRAGA
CALCRL
SUMF2
SYNGR1
YWHAE
ARHGAP6
PTEN
RBL2
SNRPA
CBX6
KAT8
RGS4
TROVE2
TNFRSF21
EGR1
HDDC2
KAT6B
ENOSF1
H2AFJ
NR2F1-AS1
HNRNPA2B1
AC113189.5
TMED5
PHLDA1
ATP1B1
SF3B1
HBP1
FLT3LG
DHPS
CYP27A1
FAM49A
DLG2
C1RL
ANP32E
CNTFR
ZC3HAV1
CDIPT
ATP6V0A1
INSIG1
SMARCC2
BCLAF1
NDRG1
MKLN1
RPAIN
AIP
ADCK3
ALDH9A1
ZC3H6
DCLK1
ADCY3
PNPLA2
DENND4C
APRT
RTN2
SMIM19
TSPAN8
NAV3
TIMP4
EIF1AY
TCAF1
TOMM20
MED30
THYN1
RET
C16orf89
LGALS3BP
MMP23B
CENPC
MIR22HG
ANP32A
CYTH3
SLC9A3R2
CTNNBL1
KRR1
POR
PTPN9
LRRN4CL
ZNF302
KPNB1
SRSF7
MAX
STIM1
CYR61
OSER1
FUOM
PPT1
OSBPL1A
IMPDH2
ABHD5
B4GAT1
FNTA
FAM65C
SCP2
ABLIM1
HYI
CD46
ERP44
CHST7
NFIX
SNX9
THSD7A
CCS
AOX1
HPCAL1
PDCD4
RP11-384F7.2
CMBL
IGSF10
C19orf60
PHGDH
CDC73
C6
BTG1
ATXN3
HSD17B4
QTRT1
CEBPZ
LDB2
ITGB1BP1
FAM3C
CAMK1
ZFR
GUSB
C1QTNF2
EIF3G
RPA2
VSTM4
DHX15
EIF3E
GUCY1B3
TMBIM1
KIF22
CALM1
UBA2
MTHFD2
AKR1C1
FIP1L1
RPS8
CHMP3
DICER1
TMEM56
PRPF8
ECE1
RECK
C7orf55
ISCU
RPL5
NR2F2-AS1
GLP2R
NAMPT
AKR1C2
LINC00493
AZI2
UFL1
EAPP
PSMG2
ARL13B
BIN1
ZHX1
EWSR1
CCDC47
CFL2
EMC7
SETBP1
JAG1
CPNE3
PTRF
SCAF11
CBR3
PGAP1
FBXL3
EPB41L1
MVP
CREG1
NUP98
PIR
SRPRA
CTSO
DIO3OS
HNRNPL
CYP4V2
NFKBIL1
PRPF6
CYP20A1
POLE4
HNRNPH3
FBXO8
DCAF8
CRYZ
POLDIP3
MPZL1
OXA1L
STAMBPL1
CPT1C
RPL7A
ZNF24
RAP1A
CRELD1
FAIM2
FAM110B
HEXB
SFT2D1
USP53
CRBN
CCNB1IP1
RPS9
ADCYAP1R1
2020-03-06
GHR
RAPH1
STMN3
PLEKHG2
CD320
CCNG1
TCF25
RNF167
KLHDC8B
TMEM106B
IRF2BPL
LAMP1
SLC16A4
ISYNA1
EIF2D
RAB5B
APOC1
NDUFV3
TMEM219
KCNJ8
LUC7L2
ZNF704
RBM5
SPTAN1
BAG6
SERPINB9
SLC43A3
MAF1
CLIP3
TBC1D17
VDAC2
RPL32
FRMD4A
TCF7L2
EIF4H
CFLAR
PMPCB
GNL1
TFAM
DDX6
BST1
STARD3
DAB2
ANG
H2AFZ
YPEL2
CDK8
KLHL24
NDUFB1
SRSF6
RASA4
RRAS
TC2N
RSF1
ZNF148
CCT7
HINT2
RPL9
PNN
ACAT1
VPS13D
STARD8
HAAO
FAM213A
ATP5D
RPL18
PROSC
CMC1
PDIA3
N4BP2L1
CDK5RAP3
TMEM80
SUCLG2
IQGAP2
COPS2
RPL13
HNRNPA3
ZBTB7A
ECI2
TERF2IP
NOVA1
MEDAG
C11orf58
ANKRD11
RASGEF1B
RPS27
HP1BP3
BTBD3
RBM4
TSC22D4
JAM2
KLHL13
TM2D1
GSTK1
CCR10
MBTPS1
U2AF1
TANK
SLC25A6
SLC16A2
C1QTNF1
SREBF1
PODXL2
TTC17
SSBP3
DCAF6
CD58
RPS25
GBGT1
RCBTB2
EML3
C1orf43
CHCHD2
PRRC2A
ARPC1B
C5orf56
OSR1
MEIS1
TMEM50B
MLLT6
GANAB
MAPRE3
PLEKHA6
PRDX2
SEL1L
MRPL32
CCDC50
VMO1
WBP11
WDR74
LDLRAD3
RPS18
LASP1
SF3A2
DEPTOR
CHRD
ANO6
SEC63
CH507-9B2.3
AKIRIN1
KMT2A
GINM1
EFCC1
DNAJB9
PGR
PLA2R1
SLC39A1
MCL1
MAFF
CETN3
EIF3A
SNX1
MEF2D
GID8
RP11-119D9.1
GTF2F1
ARID4B
TNRC6C
EBF2
RPL7
DNTTIP2
ASAH1
RPL24
HADH
SENP6
SNW1
DUSP14
SPSB3
MRPL45
CDKN1B
RPL26
BLCAP
MINA
PCBP2
TIMP1
AC013461.1
RERE
HNRNPM
FAM46C
NDUFB9
GOSR1
NRIP1
PCM1
COL5A3
XPNPEP1
VPS4B
PRICKLE1
CALHM2
ABCC9
PIH1D1
TCEA1
TTTY15
SFT2D2
GAB1
OSTF1
PARM1
TM2D3
PPIG
UBE2D3
RNPC3
RAMP2
KIAA1109
NENF
ODF3B
2020-09-15
HADHB
MDM4
TAF3
EIF3K
TNPO1
DDX39B
PLA2G16
FAXDC2
PRKDC
HSD11B2
TM7SF3
ACYP2
NLGN4Y
LONP2
CLK4
PLEKHA4
YTHDC1
CBX7
SUSD2
LYPLAL1
SOBP
PAF1
NBEAL1
MILR1
HSP90B1
MPC1
CHPT1
CSRP1
H6PD
NFAT5
DNPEP
SNX5
LAP3
CTBS
NFYC
CCNT1
MAN2C1
SURF1
CD47
AGO3
DNAJA2
LPCAT3
RP11-553L6.5
NOSIP
RAB8B
JAGN1
B4GALT3
PTGR1
CSF1
ITPR1
ROCK1
NCOA4
HERC1
RPL7L1
SELT
PRRT2
HADHA
SCRN2
FBXO21
ZBTB44
SF3A1
SESN3
PCDHGC3
RNF115
OGFR
INTS10
EIF4A1
MAP1A
LYSMD2
BNIP2
KLHDC3
BBIP1
TGOLN2
SLC41A3
GNG12
LIX1L
ACAA1
ACP2
EMC2
ADAMTSL1
PIAS1
ARID1A
LRRN3
SNX17
RNASEH2C
MFSD1
SPCS2
ATAD1
TUFM
PFKM
TRIOBP
SERP2
ANK2
POGZ
SMAD3
KLC1
DST
NAALAD2
FUCA2
PRRT1
KMT2C
GATA6
BAZ2B
A4GALT
SLIT3
KDELC2
METAP2
CDK18
DDX24
MEIS2
PBXIP1
TVP23B
ENDOD1
SOX6
OS9
RPL35A
ZC3H11A
MLH3
SUN2
AK3
PRPF38A
MFSD14A
GOLPH3
RBM39
ZNF181
MPG
DMXL2
FKBP2
LIPA
ZC3H7A
SAMM50
DDR2
ANKHD1
USP22
NCKIPSD
RNF10
OLFM1
TNFRSF1A
PIGP
ALDH6A1
MRPL24
NIPBL
CECR5
RFTN1
ATXN10
RP11-228B15.4
GPC4
FNDC3A
ZNF721
KIAA0141
MRC2
IGF2R
SP3
GHITM
CCDC28A
NKTR
CEP126
UBE3A
PPM1M
THRAP3
NUCB2
NOTCH3
RNASET2
VPS36
RP11-522B15.3
RAD23A
TRIM44
TTC14
GPHN
RPS28
SPG7
MDH1
REV3L
RPS19BP1
SAT2
ZMYM2
STOML2
LMBR1L
FBXO18
BCL6
CSGALNACT1
NTAN1
SRSF8
MRPL50
TNFSF13B
IMMP2L
MAP1LC3A
XPA
WASF3
PIK3IP1
PRR16
GPNMB
ITSN2
RDH14
IFT57
BSCL2
TNRC6A
SLU7
CALM3
ZBED5
ARHGAP24
USP47
UTRN
SSFA2
KEAP1
DDB1
ARID5A
GAB2
SMARCE1
RPS29
VPS26A
C21orf59
ACO1
DNAJC19
PRPF40A
CDS2
ZNF330
SGF29
NDN
COQ10B
IFI16
XRN1
KDM5A
CCDC59
CDC40
MLF1
BLOC1S2
SLC35A1
MTSS1L
RPL17
ZNF208
DHX36
GPAA1
XAB2
SRSF4
GGNBP2
TMEM135
FBL
CCT8
AP001347.6
RHBDD2
CLDN11
C15orf57
MAN2B1
ZNF644
ATF7IP
WRB
SNRNP70
ABCA5
NDFIP1
SLTM
FAAP20
BCL7B
GRK5
RGMB
2020-09-09
PEG3
DHRS12
UBE2B
GTF3C1
RPS27A
ARL5A
ARRDC3
RUFY3
PDS5B
ZNF506
EFCAB2
PRRC2C
CDON
RPL30
ITPRIPL2
OSBPL8
ATXN7L3B
IARS2
HPS1
TSPYL1
LTA4H
TLN1
SEC22C
BRWD1
PLAT
MKRN1
ALDH16A1
EXOSC10
SPRED2
ATF6B
LYRM5
MNAT1
GLUL
PLEKHA2
SKAP2
NAALADL2
CD14
CLSTN3
DHRS7B
KLF2
PKN2
THUMPD1
C6orf89
TGS1
2020-03-07
ST3GAL1
EXT2
TAPBP
ATP5F1
TAX1BP1
TMEM87A
ZFAS1
TNFAIP8L1
GSTM4
TMX2
EGLN2
RAB11A
GRINA
BPTF
SNRPN
SMU1
FBXO17
PPP6C
FNBP4
FAM208A
GBA
RAPGEF5
ELF2
SLC7A2
ZFYVE16
GALNT11
NSFL1C
PSMD4
VEZF1
PRMT1
GPR108
DCAF7
SPOP
NFATC1
POLR2A
RERG
AMD1
CPSF7
FBLN7
TMEM70
BSDC1
SIGIRR
RELA
YPEL3
MRPL21
TMEM243
HTATIP2
MOCS2
TMEM30A
SLFN11
MPDZ
SETX
RAB3GAP1
NQO2
ATP10D
AFF1
HECTD1
SEMA4A
MIER1
MFF
RPL13A
NUMA1
SMCHD1
C1orf27
RPA1
RPL23
FBXO44
TRERF1
OSBPL9
NACA
FBXO7
PNRC1
NUMB
ATP5B
SS18
PLRG1
PTPRA
ANAPC16
PPM1B
RNF14
STARD3NL
TNFRSF10D
CLEC11A
ZKSCAN1
PDE3A
RARB
EBAG9
BAZ1B
HELZ
XRN2
PDIA6
HDAC5
NRK
RMDN2
PFDN5
CH17-189H20.1
SRP68
BRIX1
RICTOR
RASSF1
MX2
ANKRD65
MRPL10
VPS13C
PDCD2
HLA-DPB1
JUND
SSBP4
WAC
ASNSD1
CHMP5
SMIM7
CTSH
LPAR6
SLCO3A1
MLEC
HNRNPU
GAS7
SSBP2
C21orf33
REXO2
MYO9A
TMX3
FAM120AOS
BUB3
CD248
BAG5
ACAT2
IL11RA
ZNF800
HIBADH
HSPA12A
MAP2K7
PCGF5
EXOC7
IDH3B
ZNF655
DDAH2
RAF1
TADA3
EPC1
PIGH
PPP6R3
CDK17
STXBP6
ZNF791
LRRFIP2
RNF217
ARRB1
RP11-983P16.4
CHST12
PITHD1
FAM126A
CREBZF
THSD4
MECP2
TPT1
RAB21
ERO1B
ARAP1
NSRP1
NARS
GADD45A
CTNNA1
MAN1C1
PRPF38B
KIRREL
MGMT
SOX15
PHYKPL
PPWD1
HTRA2
CCDC109B
OAZ2
CLASP2
SLC35A5
FAM174A
RSBN1
TOPORS
ZNF460
EXOSC8
FILIP1L
FAM21C
CEP68
LSM14A
USE1
ZC3H14
PHACTR2
CLK3
PTCD3
NDUFV1
WWTR1
YLPM1
TOX4
ALG13
TMEM9
NOB1
CERK
AHSA2
AK6
BZW1
ACADM
MRPL16
LINC00969
FAT4
CREBL2
FOPNL
PDPK1
PGPEP1
DPF2
MMADHC
HDHD2
DNAJC12
UXS1
VAMP3
B3GLCT
CYB561A3
IPO7
NID2
CANX
TMEM165
MED28
NUFIP2
RASSF8-AS1
TUBE1
LDHB
CPSF6
PDZD8
PQLC2L
SYCE1L
SDHB
PJA2
RNFT1
SDF4
LMBR1
SIL1
CHRAC1
KANK2
RBBP7
PEAK1
PEX19
CLPTM1
FGD5-AS1
PHB2
DNAJB12
PITRM1
USP11
TMEM245
EPRS
MPRIP
JKAMP
EDA
TOMM22
DDX42
PSMC6
COPS6
CUL1
TBX2-AS1
RBBP4
GLIPR2
RFC1
MRFAP1
TMEM175
IQCB1
UPF2
DNAJB14
ASB3
LENG8
IGSF8
ATIC
PLA2G5
PER2
PRKAA1
CCNL2
INSR
MAN1A2
PTBP1
CASC4
MALSU1
TBL1XR1
EIF3J-AS1
VDAC3
DARS
RAB14
C6orf48
AC011043.1
PRR4
ZC3H13
DCP1A
PHC3
NEMF
ACOX2
MED6
THAP7
WDR33
DUSP22
HNRNPLL
SRM
PAXIP1-AS2
NDUFS7
HMGXB4
CCDC186
C12orf10
FIGN
NUP153
SF3A3
RBM22
DAAM2
MN1
STRA13
MORC3
GPATCH8
AP2B1
MTCH1
NGDN
ATP6V1E1
IL6
SF3B3
CBWD5
ZBTB4
ALDH3A2
DDX54
CLIP4
RECQL
IDI1
HAS2
CIR1
CCNG2
OPHN1
ERAP1
YIPF4
AASS
PPIL4
RPL34
CMAS
GNAQ
HSDL2
NOP56
MSI2
HERPUD2
RP11-390P2.4
MON2
LTBR
GCSH
FAM102B
ZNF771
STRADB
CELF2
PTPRG
NUDT9
PIGK
C1D
ARSA
TRIB1
FAM172A
MRPS22
POLR2C
XPC
SEC14L1
KLHL28
MT-ND6
MRPL38
CRIM1
CAB39L
MRPS18B
CCT5
NCOA1
C1QBP
DLST
NLRP1
PTPN2
PSMD12
CELF1
GOLGA4
CXCL16
SUB1
GMFB
KLHDC2
ETS2
CYB5D2
ZNF493
BCCIP
CGRRF1
LARP7
MCM3AP
GUCY1A3
FRA10AC1
RANGRF
ATP5G1
SERTAD1
TXNDC15
FAM204A
RB1CC1
LINC01184
CEBPZOS
CRTC2
PLD1
ST13
GALT
TMEM159
SYTL4
TRMT1L
TMEM50A
CTR9
FUZ
CGGBP1
ZNF524
MOAP1
DCTN6
BRMS1L
ZNF397
PSMC1
SNRPA1
NDUFS1
EDEM3
RALY
DNAJC10
DERL3
HSF1
RSBN1L
SRRT
GPC6
LINC-PINT
PAPD4
POLK
PSMD3
DENND6A
PLK3
AMFR
ORC3
PURA
FBXO9
KRIT1
RIOK1
UQCRFS1
KIZ
RPS13
NSL1
MGA
DDX50
PACSIN3
IMP3
ZSWIM7
AGPS
ORMDL1
NAB1
TMSB4X
RGL2
BTF3
HERC2
TNKS2
2020-09-10
NYNRIN
UBR4
FASTKD2
SLC35G2
TARDBP
SNX2
TMX1
USP48
MCFD2
NRDC
MGAT1
SDF2
SNUPN
BCKDHA
TRPV2
NFU1
CPT1A
CYC1
SIGMAR1
NEXN
MRPS26
SUMF1
OTUB1
PPP4R2
SIDT2
PKIG
IST1
HAUS4
CNOT2
GHDC
SAFB
CNIH1
GPN3
NCK2
MTRR
DENND4A
SCAPER
TRIM4
LAPTM4B
[truncated: 2,879 more rows]
