# Supplementary material
Source: Research Square preprint supplement (doi:10.21203/rs.3.rs-8583137/v1)

# Supplementary Fig. S1

**a**

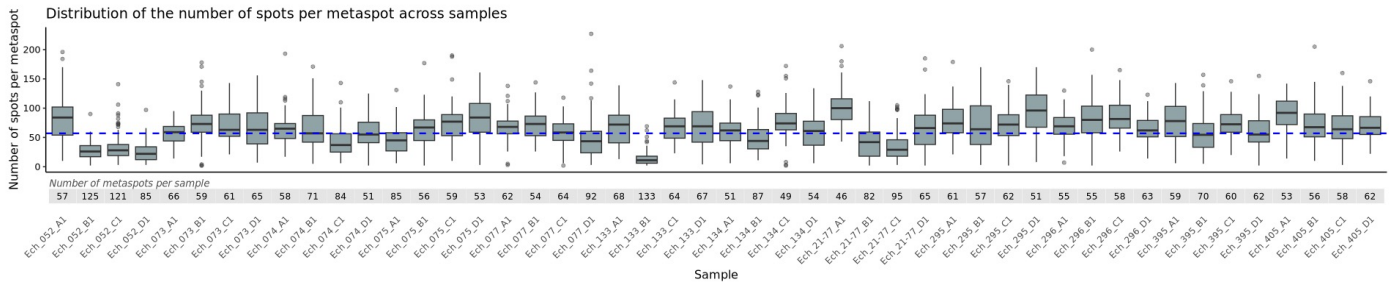

**b**

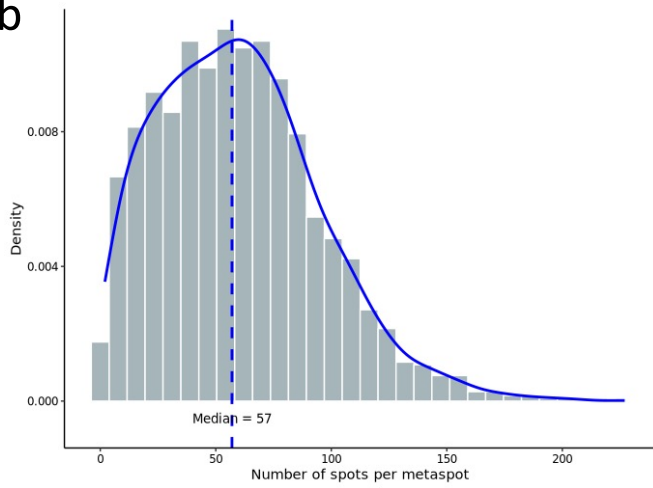

**c**

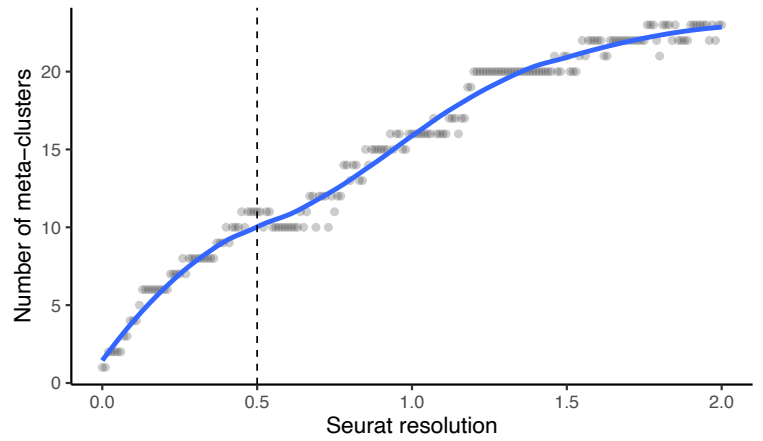

**d**

Cluster transitions across resolutions (clustree)

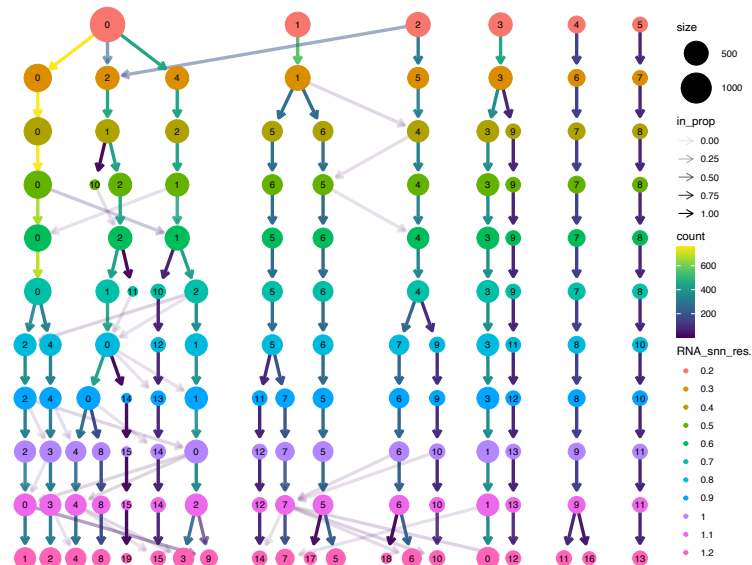

**e**

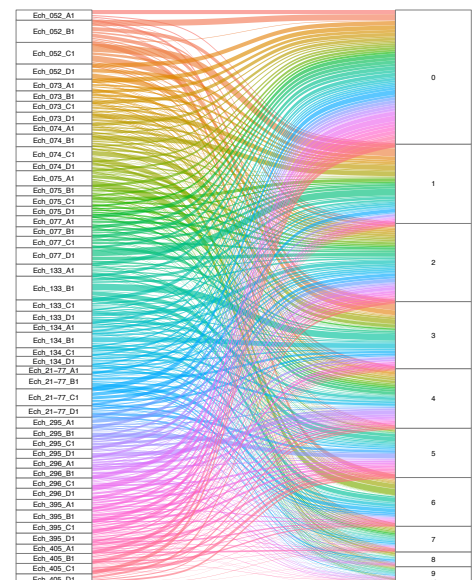

Supplement: Supplementary file 1 [file 9ac687f71860b1ddd2f5a17d.pdf]

# Supplementary Fig. S9

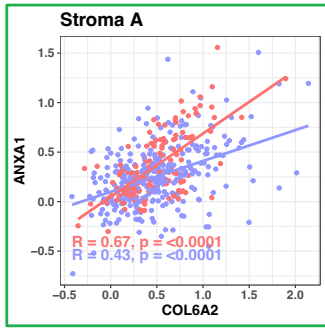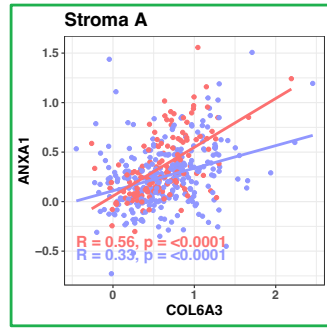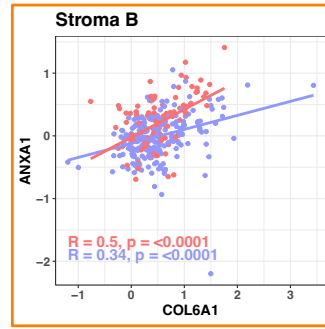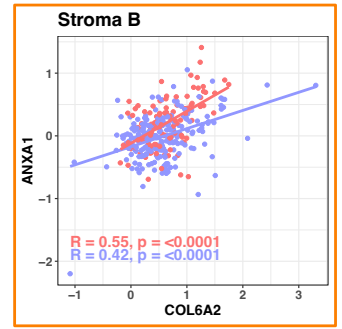

Supplement: Supplementary file 2 [file a3b3549dd410fa2feafada94.pdf]
